BIORXIV

## The fall and rise of group B *Streptococcus* in dairy cattle: reintroduction due to human-to-cattle host jumps?

Chiara Crestani<sup>1\*</sup> [0000-0002-8948-1941](#), Taya L Forde<sup>1</sup> [0000-0001-9058-7826](#), Samantha J Lycett<sup>2</sup> [0000-0003-3159-596X](#), Mark A Holmes<sup>3</sup> [0000-0002-5454-1625](#), Charlotta Fasth<sup>4</sup>, Karin Persson-Waller<sup>4</sup> [0000-0002-8481-4313](#) and Ruth N Zadoks<sup>1,5,6</sup> [0000-0002-1164-8000](#)

<sup>1</sup>Institute of Biodiversity, Animal Health and Comparative Medicine, University of Glasgow, Garscube Campus, Glasgow G61 1QH, UK; <sup>2</sup>The Roslin Institute, University of Edinburgh, Easter Bush Campus, Midlothian EH25 9RG, UK; <sup>3</sup>Department of Veterinary Medicine, University of Cambridge, Madingley Rd, Cambridge CB3 0ES, UK; <sup>4</sup>National Veterinary Institute (SVA), SE-751 89 Uppsala, Sweden; <sup>5</sup>Moredun Research Institute, Pentlands Science Park, Bush Loan, Penicuik EH26 0PZ, UK; <sup>6</sup> School of Veterinary Science, University of Sydney, Werombi Road, Camden, NSW 2570, Australia.

\*To whom correspondence should be addressed. E-mail: [c.crestani.1@research.gla.ac.uk](mailto:c.crestani.1@research.gla.ac.uk)

### KEYWORDS

*Streptococcus agalactiae*; emergence; anthroponosis; reverse zoonosis; plasmid; host adaptation

### REPOSITORIES

Reads for all isolates sequenced in this study have been submitted to the ENA Sequence Read Archive (SRA). SRA accession numbers are included in Table S1, supplementary material, available in the online version of this article.

### 1 ABSTRACT

2 Group B *Streptococcus* (GBS; *Streptococcus agalactiae*) is a major neonatal and opportunistic bacterial  
3 pathogen of humans and an important cause of mastitis in dairy cattle with significant impacts on food  
4 security. Following the introduction of mastitis control programs in the 1950s, GBS was nearly eradicated  
5 from the dairy industry in northern Europe, followed by re-emergence in the 21<sup>st</sup> century. Here, we sought  
6 to explain this re-emergence based on short and long read sequencing of historical (1953-1978; n = 44)  
7 and contemporary (1997-2012; n = 76) bovine GBS isolates. Our data show that a globally distributed  
8 bovine-associated lineage of GBS was commonly detected among historical isolates but never among

9 contemporary isolates. By contrast, tetracycline resistance, which is present in all major GBS clones  
10 adapted to humans, was commonly and uniquely detected in contemporary bovine isolates. These ob-  
11 servations provide evidence for strain replacement and suggest a human origin of newly emerged strains.  
12 Three novel GBS plasmids were identified, including two showing >98% homology with plasmids from  
13 *Streptococcus pyogenes* and *Streptococcus dysgalactiae* subsp. *equisimilis*, which co-exist with GBS in  
14 the human oropharynx. Our findings support introduction of GBS into the dairy population due to human-  
15 to-cattle jumps on multiple occasions and demonstrate that reverse zoonotic transmission can erase  
16 successes of animal disease control campaigns.

## 17 **IMPACT STATEMENT**

18 Pathogens can jump between humans and animals. Animal domestication and intensification of livestock  
19 production systems have caused multiple human to animal spill-over events, sometimes with significant  
20 impact on animal health and food production. The most common production-limiting disease of dairy  
21 cattle is mastitis, inflammation of the mammary gland, which can be caused by group B *Streptococcus*,  
22 a common commensal and pathogen of humans. Using genomic data from historical and recent isolates,  
23 we show that re-emergence of this pathogen in the dairy industry in northern Europe is due to strains with  
24 genomic signatures of human host-adaptation, including antimicrobial resistance genes and plasmids.  
25 This shows how elimination of animal diseases may be hampered by humans serving as a reservoir of  
26 multi-host pathogens, and reverse zoonotic transmission.

## 27 **1. Introduction**

28 Group B *Streptococcus* (GBS), or *Streptococcus agalactiae*, is the leading cause of human neonatal  
29 meningitis in high income countries [1] and causes invasive and non-invasive disease in adults with or  
30 without underlying medical conditions [2,3]. GBS is also a commensal of the lower gastrointestinal and  
31 urogenital tract of men and women, with an estimated carriage prevalence of 20 to 30% [4,5]. Additional  
32 colonisation sites include the skin and oropharynx [5,6,7]. Many animal species can be infected with  
33 GBS, and major economic impacts are recognised in the global dairy and aquaculture industries.  
34 Emergence of GBS in animal production systems occurred concurrently with changes in husbandry  
35 practices, such as use of milking machines, or the intensification of commercial aquaculture [3,8,9].

36  
37 In the 1950s and 1960s, mastitis control programs were implemented to limit the impact of GBS  
38 on milk production. Such programs focused on identification and antimicrobial treatment of infected  
39 cattle and prevention of GBS transmission during milking, and led to near-elimination of bovine GBS  
40 in Canada [10], the UK [11] and northern Europe [12,13,14], with elimination (“reduction to zero of the

41 incidence of disease or infection in a defined geographical area” [15]) achieved by most farms in those  
42 areas. The success of GBS mastitis control programs, which predate genetic typing of bacterial isolates  
43 by several decades, was attributed to the perception that GBS is an “obligate intramammary pathogen  
44 of dairy cattle” [8], despite its prevalence in humans. In the UK [16], the USA [9], and Portugal [17], a  
45 single bovine-adapted lineage of GBS, clonal complex (CC) 61, predominates in cattle. This observation,  
46 combined with the absence of CC61 among human GBS collections, has fuelled the perception that this  
47 GBS lineage is bovine-specific citeRichards2019, Bisharat, Almeida.

48

49 In recent years, re-emergence of GBS in dairy herds has been documented in several Nordic countries  
50 [2,8,18]. This phenomenon is partly attributed to changes in dairy production systems, including herd  
51 size, ownership structure and management practices [8,18]. It is not clear, however, why approaches  
52 that were adequate for control of GBS in other decades or countries would fail in northern Europe,  
53 unless pathogen evolution has changed the paradigm on which these programs were built, necessi-  
54 tating the use of additional or alternative approaches. Such insight is fundamental to the development  
55 of new animal disease control strategies, especially those that do not rely on routine use of antimicrobials.

56

57 We hypothesised that the bovine-adapted GBS lineage CC61 was eliminated through dedicated  
58 mastitis control programs, with subsequent emergence of GBS from other lineages, possibly as a result  
59 of host-species jumping, as described for *Staphylococcus aureus* mastitis in cattle [19] and suggested  
60 for GBS in fishes [3]. To test this, we investigated GBS isolates collected from bovine milk in Sweden  
61 over six decades, focusing on shifts in population composition, and the detection of genetic markers of  
62 host adaptation that might provide insight into a potential reverse zoonotic origin of newly emerged GBS  
63 lineages in cattle.

## 64 **2. Methods**

### 65 **Bacterial Isolates**

66 Historical (1953-1978; n = 45) and contemporary (1997-2012; n = 77) bovine GBS isolates were obtained  
67 from the National Veterinary Institute (SVA; Table S1). No isolates were available from 1979 through 1996  
68 (inclusive). Isolates originated from bovine milk samples from 107 farms and had been submitted to SVA  
69 for diagnostic testing. In Europe, GBS isolates from a dairy farm generally belong to a single strain or  
70 sequence type (ST) [18,20]. Therefore, one isolate per farm per year was selected for sequencing, with

71 one exception (Table S1). Archived isolates were plated on sheep blood agar (E&O Laboratories) and  
72 grown overnight at 37°C to confirm viability and purity. An isolated colony was inoculated into Todd-  
73 Hewitt broth (Oxoid-Thermo Fisher Scientific) and incubated aerobically at 37°C for 24 hours to prepare  
74 a bacterial suspension for subsequent DNA extraction.

## 75 **Short Read Sequencing**

76 DNA was extracted with the GenElute Bacterial Genomic DNA Kit (Sigma-Aldrich) as per the manufac-  
77 turer's instructions. Library preparation was carried out with the Nextera XT DNA Sample Preparation  
78 Kit and MiSeq Reagent Kit V2 Library Preparation Kit (Illumina Inc.). DNA was sequenced with Illumina  
79 MiSeq technology. Paired-end raw reads were trimmed and filtered with ConDeTri v2.3 to remove  
80 low-quality bases and PCR duplicates [21] and *de novo* assembly was performed with SPAdes v3.11.1  
81 [22] (the complete assembly pipeline can be found in the supplementary material).

82  
83 Quality control of the assemblies generated from Illumina data (n=122) was carried out with QUAST  
84 v5.0.2 [23], with 2603V/R (human GBS, ST110, CC19, accession NC\_004116) as the reference genome.  
85 Results for the total length of the genome, total number of contigs, N50 and GC content were plotted with  
86 the Python Seaborn library [24] (Fig. S1) and low-quality genomes were identified with a custom-built  
87 bash pipeline (see supplementary material). Dataset mean values for genome length, total number  
88 of contigs and N50 were 2,126,345 bp, 58 and 492,052 bp, respectively. Two genome assemblies  
89 were excluded from subsequent analyses: the first had a high GC content compared to the dataset  
90 average (isolate GC = 36.92%, dataset mean plus twice standard deviation = 35.43% ± 0.32). The  
91 sequence was checked with KmerFinder v3.1 [25] and was identified as belonging to a different bacterial  
92 species, *Enterococcus thailandicus*. The second genome had low quality scores for total number of  
93 contigs (n = 1,837), N50 (1,992 bp) and genome length (2,751,323 bp), which are indicative of possible  
94 contamination. Therefore, only 120 high-quality genome assemblies were selected for subsequent  
95 analyses. The distribution of contig numbers for the 120 high quality assemblies was bimodal (Fig.  
96 S2), with most of the more fragmented genomes belonging to bovine-adapted lineage CC61 (mean  
97 contig number = 112, compared to mean contig number = 35 for other genomes; Fig. S2B). Genome  
98 fragmentation was attributed to presence of a relatively high number of mobile genetic elements (MGE)  
99 and insertion sequences (IS) in this lineage [9,26].

## 100 **Long Read Sequencing**

101 To obtain closed circular genomes, Oxford Nanopore MinION sequencing [27] was applied to a subset of  
102 isolates (n=22, Table S1). Within each lineage, isolates were selected to maximise the diversity in terms  
103 of ST, antimicrobial resistance determinants and presence/absence of integrative conjugative elements  
104 (ICE) based on analysis of the short read sequencing data. Two libraries, each consisting of 11 samples  
105 and a negative control, were prepared with the Rapid Barcoding Kit (SQK-RBK004 - Oxford Nanopore  
106 Technologies) and sequenced for 2 to 5 hours, generating an average of 1.73 Gb per run, with an esti-  
107 mated mean sequence coverage of 60x. Guppy v3.3.0 [28] was used for base calling and demultiplexing,  
108 and Unicycler v0.4.8 [29] was used to generate high-quality hybrid assemblies of raw Nanopore and  
109 Illumina data. Unicycler was able to resolve 20 complete genomes out of 22 generated using Oxford  
110 Nanopore MinION sequencing. Nineteen of these were generated with a hybrid Illumina-Nanopore reads  
111 assembly, and one (MRI Z2-182) using long-read-only assembly. The hybrid assembly for this genome  
112 generated eight contigs. We were not able to resolve closed genomes for isolates MRI Z2-332 and MRI  
113 Z2-340.

## 114 **Core Genome Analysis**

115 A core genome alignment was obtained with Parsnp v1.2 [30]. RAxML-NG v0.9.0 [31] was used to infer  
116 a maximum-likelihood tree under a GTR+G model, which was inspected and annotated using iTOL [32].  
117 Nucleotide sequences were annotated with Prokka v1.13.7 [33], and Roary v3.12.0 [34] was used to  
118 generate a pangenome. To investigate unresolved relationships between isolates that could be caused  
119 by recombination in the core genes, SplitsTree v4.15.1 [35] was used (Fig. S3).

120

121 MLST profiles were identified with SRST2 v0.2.0 [36] and capsular serotyping was conducted *in*  
122 *silico* following the method described by the Centers for Disease Control and Prevention (CDC) [37].  
123 Briefly, BLASTn was used to search genome assemblies for the presence of serotype-specific short  
124 sequences extracted from the capsular serotype operon of selected reference genomes. With this  
125 approach, a perfect identity match is required for serotype VII and IX, whereas a minimum identity (ID)  
126 of 96% is suggested for serotypes Ia, Ib, and II through VI. We first validated this method on a database  
127 of publicly available GBS genomes [38], comprising human and animal sequences. Whole genome  
128 sequence (WGS) serotyping results matched perfectly with phenotypic typing methods. A lower ID  
129 threshold was observed for most serotype Ia strains in our study compared to the CDC study [37], as the

130 majority of serotype 1a nucleotide sequences had a 94% ID match. Although most genomes had only one  
131 best match, two best matches were observed in a few cases. For these, the sequences were re-analysed  
132 using an *in silico* serotyping method that is based on the alignment of longer serotype-specific capsular  
133 operon sequences [39].

### 134 **Analysis of Accessory Genome Content**

135 Antimicrobial resistance genes were detected with ResFinder v3.2 [40]. Presence of the lactose operon  
136 (Lac.2) [26,41,42], which is a marker of bovine host adaptation, was assessed with BLASTn (query  
137 coverage QC>90%, and ID 95%), searching for genotypes Lac.2a, Lac.2b and Lac.2c [41]. Detection of  
138 ICE Tn916 and Tn5801, which carry the tetracycline resistance genes typical of human-associated GBS  
139 lineages [38], was also conducted with BLASTn searches (QC >80% and ID>95%), using reference  
140 sequence *S. agalactiae* 2603V/R, ICESag2603VR-1 (length = 18,031 bp) and *S. agalactiae* COH1,  
141 AAJR01000021.1 (selected region from 14,055 to 34,289; length = 20,235 bp), respectively. When  
142 *tet*(M)-positive sequences showed high identity (ID>95%) but only partial query coverage (QC<80%)  
143 with either of the two elements, an area of 20,000 bp surrounding *tet*(M) was manually selected and  
144 BLASTn was used to determine the ICE family with ICEfinder [43].

145  
146 Lac.2 variants and ICE sequences were extracted from the genomes for phylogenetic analysis  
147 with ARIBA v2.14.4 [44] and manual curation when only a partial sequence was obtained because  
148 of divergence from the reference. Manual extraction of amino acid sequences was carried out from  
149 annotation files for the Lac.2 integrases genes, when possible, and for the *tet*(M) gene. Alignments of  
150 the nucleotide sequences of the ICE and the Lac.2 variants, and of the amino acid sequences of the  
151 *tet*(M) and the Lac.2 integrase genes, were carried out with MAFFT v7.407 [45] and Neighbor-Joining  
152 trees were built within Geneious software [46] with a Jukes Cantor model (default settings) (Fig. S4 and  
153 Fig. S5).

154  
155 Figures were edited using Inkscape ([www.inkscape.org](http://www.inkscape.org)).

### 156 **3. Results and Discussion**

#### 157 **Eradication and Re-emergence of GBS is Associated with Strain Replacement**

158 To test the hypothesis that the near-elimination and re-emergence of GBS in the Swedish dairy cattle  
159 population was associated with strain replacement, we inferred sequence types (ST) from the genomes  
160 of 120 GBS isolates from bovine milk, including 44 historical isolates collected from 1953 to 1978 and  
161 76 contemporary isolates collected from 1997 to 2012. GBS detection in milk was exceedingly rare in  
162 the intervening period, and no stored isolates were available for typing. Bovine-adapted lineage CC61  
163 was exclusively detected among historical isolates collected before 1970, as was minor lineage CC297.  
164 By contrast, two other lineages (CC1 and CC103/314) were only detected among contemporary isolates  
165 (Fig. 1). CC61, also referred to as CC61/67 or CC67, was first recognised in the UK [16] and is also  
166 widespread in cattle in the USA [9] and Portugal [17]. With the exception of three recent cases in China  
167 [47], CC61/67 has never been reported in people. Its absence from humans may be due to pseudogeni-  
168 sation of the operon that encodes the polysaccharide capsule, an important virulence factor in human but  
169 not bovine GBS infections [17]. Without alternative host species, elimination of CC61 from the cattle pop-  
170 ulation would mean that no reservoir is left, precluding re-emergence and explaining its absence among  
171 contemporary isolates. Not much is known about the origin or fate of CC297, which is a rare type in  
172 humans as well as animals. Contemporary lineage CC1, by contrast, is common among human carriage  
173 and disease isolates, including in Sweden [2,48]. It has recently been recognised as a common cause  
174 of bovine mastitis in northern Europe [2,18,20] and elsewhere [6]. Contemporary lineage CC103/314 is  
175 recognised as a human pathogen in Asia, including Thailand [49], Taiwan [50], and China [51]. In cattle,  
176 it is found across multiple continents, with reports of CC103/314 as a common lineage among bovine  
177 isolates from China [52], Colombia [6], Denmark [20], Finland [2] and Sweden (Fig. 1). Re-emergence of  
178 pathogens may be due to cessation of control activities once near-elimination is achieved, with or without  
179 re-introduction of pathogens [15]. In Northern Europe, changes in animal husbandry and transmission  
180 patterns may have contributed to GBS re-emergence [2,18], and the lineage-replacement we describe  
181 here shows that re-introduction of GBS must also have occurred.

#### 182 **Host-adaptation Markers Suggest Human-to-Bovine Host Jumps**

183 The majority of CC1 (27 of 30, 90%) and many CC103/314 (7 of 18, 39%) isolates carried the tetracy-  
184 cline resistance (TcR) gene *tet(M)*, which was not detected in any historical isolates. TcR genes were  
185 carried by ICE Tn916 or Tn5801 or a Tn5801-like element (29, 6 and 2 of 37 *tet(M)* positive genomes,



186 respectively; supporting material, Fig. S4). All bovine CC1 isolates belonged to serotype V, and TcR was  
187 predominantly associated with Tn916 within this clade. TcR in CC103/314 was exclusively associated  
188 with Tn5801 (Fig. 1). TcR is rare among bovine isolates but very common among human isolates [9]. In-  
189 deed, the human GBS population is dominated by a few GBS lineages that expanded after acquisition of  
190 TcR [38]. We interpret the presence of TcR in newly emerged bovine GBS lineages as an indication that  
191 those lineages have a human origin. In human GBS, CC1 serotype V acquired Tn916 with TcR around  
192 1935 [38]. Tn5801 carrying TcR was acquired by human GBS around 1920 for CC17 and around 1950  
193 for CC23, with no year reported for CC10 [38]. Since their acquisition, TcR determinants have persisted  
194 in the human GBS population even in the absence of selective pressure, presumably as a result of low  
195 fitness cost [38]. In our study, other tetracycline resistance genes (*tet(A)* and *tet(K)*) were detected once  
196 and three times, respectively, macrolide and lincosamide resistance genes *ermB* and *InuA* and amino-  
197 glycoside resistance gene *str* were detected once, and chloramphenicol resistance genes *cat(pC221)*  
198 and *IsaC* were detected 2 and 5 times, respectively (Table S1). The low prevalence of resistance reflects  
199 longstanding restrictive veterinary antimicrobial use policies in Sweden, and the use of narrow spectrum  
200 penicillin as drug of first choice for bovine GBS treatment [53].

## 201 **Bovine GBS Shares Plasmids with Human-pathogenic Group A *Streptococcus* and Group G** 202 ***Streptococcus***

203 Plasmids are rarely reported in GBS [9], but using high-quality circularised hybrid assemblies of raw  
204 Nanopore and Illumina data obtained for a subset of 20 GBS isolates, we identified three plasmids and  
205 one integrative element among four complete hybrid assemblies, belonging to three different lineages  
206 (Fig. 2). Plasmid pZ2-265 (isolate MRI Z2-265, ST61, CC61, length = 3,617 bp, accession MW118669),  
207 was nearly identical (QC 100%, ID 99.28%) to plasmid pA996 from *Streptococcus pyogenes* or group  
208 A *Streptococcus*, GAS [54]. The plasmid was detected in five isolates belonging to CC61 (twice using  
209 hybrid assembly and three times using BLASTn on short-read assemblies; Table S1). It encodes a  
210 toxin/antitoxin system, comprising a toxin of the RelE/ParE superfamily, and a prevent-host-death  
211 antitoxin (*phd*) (Fig. 2A). The latter represses transcription of the toxin and prevents host death by  
212 binding and neutralising the toxin [55]. Plasmid pZ2-174 (isolate MRI Z2-174, ST314, CC103/314, length  
213 = 3,041 bp, accession MW118668) showed significant similarity with plasmid pW2580 (QC 99%, ID  
214 98.85%) from another human-associated pyogenic streptococcal species, *Streptococcus dysgalactiae*  
215 subsp. *equisimilis* or group G *Streptococcus* (GGS). This plasmid encodes the dysgalactin gene (*dysA*)



216 (Fig. 2B), a bacteriocin directed primarily against *S. pyogenes* [56] and its immunity factor (*dysl*) [57].

217

218 GAS is uniquely associated with human hosts, and co-exists with GBS in the human oropharynx,  
219 as does GGS [7]. pW2580 may provide a survival advantage to GGS when it co-exists with GAS in the  
220 oropharynx. Exchange of plasmids or other mobile genetic elements between GAS, GBS and GGS is  
221 possible in this niche [7] and could potentially be followed by human to bovine transmission of GBS,  
222 as documented in epidemiological and evolutionary studies [9,58]. Finding two plasmids previously  
223 associated with other human *Streptococcus* species in bovine GBS isolates suggests that reverse  
224 zoonotic events (i.e. human-to-bovine spill-over) have occurred more than once. It is conceivable, albeit  
225 speculative, that early plasmid acquisition by GBS (pZ2-265 from GAS) and spill-over occurred prior  
226 to the expansion of CC61/67 in cattle, and that human GBS subsequently acquired other plasmids  
227 (pZ2-174 from GGS) and TcR prior to the recent expansion of CC1 and CC103/314 in cattle.

228

229 The third plasmid identified in this study, pZ2-336, (isolate MRI Z2-336, ST8, CC6/10, length =  
230 3,973 bp, accession MW118670) did not show significant similarity with known plasmids. It encoded  
231 genes for plasmid mobilisation and recombination but no genes involved in bacterial protection or toxicity  
232 (Fig. 2C). In the same genome assembly, a second circular element was detected (length = 19,091  
233 bp, accession MW118671), showing features of ICE or integrative mobilizable element (IME; tyrosine  
234 recombinase/integrase, relaxase), plasmids (plasmid mobilisation protein, plasmid replication initiation  
235 protein *repB*) and insertion sequences (IS; IS6 family transposase) (Fig. 2D). Additionally, it encoded  
236 genes with functions of cell adhesion (Cna protein B-type domain superfamily) and virulence factor  
237 expression (class A sortase). ICEFinder [43] identified a segment of this element (length = 11,068bp) as  
238 a putative IME. Hence, this newly described element could either belong to a novel unclassified family of  
239 mobile genetic elements (MGE) or it could be an actual IME.

240

241 None of the plasmids carried antimicrobial resistance genes.

## 242 **Multi-host Lineages of GBS Occur among Historic and Contemporary Bovine GBS Isolates**

243 Two lineages, CC23 and CC6/10, were identified among both historical and contemporary bovine isolates  
244 (Fig. 1). CC23 is a common cause of bovine mastitis in northern Europe, whilst CC6/10 is less prevalent  
245 [2,20]. Both lineages affect humans and terrestrial and aquatic animals, including homeothermic species

246 and poikilothermic species, e.g. seals and crocodiles, respectively, for CC23, or dolphins and fishes, re-  
247 spectively, for CC6/10, and are considered to be multi-host lineages [9,59,60]. Multiple serotypes are  
248 associated with both lineages [9]. For CC23 serotype Ia is primarily found in humans and serotype III in  
249 cattle [2,41]. In our study, isolates from CC23 mostly belonged to serotype III although a few serotype  
250 Ia isolates were detected in both eras. Four serotypes were identified in CC6/10 (Table S1). The de-  
251 tection of multihost lineages among historical and contemporary isolates could reflect ongoing low-level  
252 transmission in cattle during the interim period, as suggested by the dominance of serotype III in CC23.  
253 Alternatively or additionally, it could be due to sporadic reverse zoonotic transmission, as suggested in  
254 studies from Colombia [6], Denmark [8,41], and the USA [58], and compatible with occasional detection  
255 of CC23 isolates with the predominantly human-associated serotype Ia.

### 256 **Genome Plasticity Facilitates Host-adaptation**

257 Based on analysis of 120 Illumina assemblies, the bovine GBS pangenome comprised 7,845 genes, of  
258 which the majority (80.3% or 6,297 genes) were accessory genes (989 shell genes and 5,308 cloud  
259 genes), with 17.8% core genes (present in all genomes) and a minority of soft core genes (present in 95  
260 to 99% of genomes). The lactose operon Lac.2 was detected in almost all isolates in our study (Table S1).  
261 Lac.2 encodes the metabolism of lactose, or milk sugar, which constitutes a major adaptation of bovine  
262 GBS to the mammary gland, whereas it is largely absent from human GBS [2,26]. Integration sites for  
263 the lactose operon included the N-6 DNA methylase gene (N-6DNAM), *yxdL* (a multi-copy gene), *rgbA*,  
264 *lacD* from the Lac.1 operon [26], *gcvT* and hypothetical genes (Table S1), whereby each Lac.2 variant  
265 could be integrated at multiple sites, e.g. *lacD* or *rgbA* for Lac.2a, N-6DNAM or *yxdL* for Lac.2b and N-  
266 6DNAM or *gcvT* for Lac.2d positive isolates (Fig. 3). The latter is a new Lac.2 operon identified in this  
267 study that combines features of Lac.2a and Lac.2b (Fig. S5) [26,41]. Phylogenetic analysis showed that  
268 closely related Lac.2 sequences can belong to different variants (Fig. S5) and multiple Lac.2 variants  
269 were identified within most STs (Table S1). The heterogeneous distribution of the lactose operon and  
270 the diversity of integration sites illustrates the genome plasticity of GBS, which facilitates acquisition of  
271 accessory genome content and migration between host species [9].

### 272 **Concluding Comments**

273 Although often described as an obligate intramammary pathogen of dairy cattle in the veterinary  
274 literature, GBS is a multi-host pathogen and a host-species jumper with diverse habitats on- and off-farm

275 [2,9,18]. Evolutionary evidence shows that human-to-bovine jumps are twice as likely as migration  
276 in the opposite direction [9]. Here, we provide evidence that elimination of a major bovine-adapted  
277 lineage (CC61) in Swedish dairy cattle was followed by emergence of new lineages that carry evolu-  
278 tionary evidence of human origin in the form of TcR markers [38], suggesting introduction of human  
279 lineages into the cattle population through reverse zoonotic transmission. Subsequently, these new  
280 lineages likely established themselves in cattle with the acquisition of the lactose operon Lac.2 [26],  
281 which represents the most important marker of the bovine-specific GBS accessory genome known  
282 to date. This sequence of events is supported by the fact that TcR is largely retained even in the  
283 absence of selective pressure [38], such as in the Swedish dairy industry where antibiotic usage is low.  
284 The lactose operon does not appear to be retained outside of the bovine host [2,41]. Thus, TcR and  
285 Lac.2 provide historical, or long-term, and recent, or short-term, “records” of host adaptation, respectively.

286  
287 Due to the unique historical nature of our isolate collection, direct comparison with genomic se-  
288 quences of human isolates from the same area and era is not possible. Such comparisons, however,  
289 are not necessary for evolutionary analysis, whereby host species jumps have commonly been inferred  
290 based on sequence data of isolates derived from different host species without known interactions or  
291 epidemiological relatedness [19,61,62]. For the emergence of GBS in farmed species, several routes  
292 of transmission from humans to animals can be envisaged, including, in the case of fishes, the use of  
293 human waste for nutrient recycling and, in the case of cattle, the handling and milking of cows, which  
294 may lead to direct human-to-animal transmission [6,58,41]. Changes in animal husbandry systems  
295 combined with pathogen evolution are the likely explanation for the re-emergence of GBS, which has  
296 been observed in several countries in Europe [2,18,63].

297  
298 Of the two emerging lineages in cattle, CC1 is known to co-circulate in the human and bovine  
299 populations in northern Europe [2]. By contrast, CC103/314 is common in dairy cattle on multiple  
300 continents but rare in humans, with the exception of Asia. Despite its low prevalence in humans, CC103  
301 may have emerged in cattle due to a spill-over event, with subsequent amplification in modern dairy  
302 systems. There is precedent for such a chain of events, as there is reasonable evidence that GBS  
303 ST283, which is rare among human GBS isolates, emerged in aquaculture during its intensification in  
304 Asia as the result of spill-over from humans, with acquisition of fish-associated MGE facilitating this  
305 process [3,60]. Host switching exposes GBS to different selective pressures and sources of accessory

306 genome content [9], including plasmids, as demonstrated for GBS, GAS and GGS in the human  
307 oropharynx [7], and other MGE, as demonstrated for the lactose operon in GBS, *Streptococcus uberis*  
308 and *Streptococcus dysgalactiae* subsp. *dysgalactiae* in the bovine udder [26]. We propose that the  
309 concept of “genetic species” and “ecological species”, as previously described for *Thermotoga* spp. also  
310 applies to streptococci (Fig. 4) [64]. As farming systems, host contact structures, and selective pressures  
311 change, new strains and transmission routes of GBS may continue to emerge through zoonotic and  
312 reverse zoonotic transmission, potentially erasing the success of decades of disease control efforts or  
313 creating new threats to animal and public health. Control of GBS and other multi-host pathogens will  
314 require ongoing monitoring of pathogen diversity across host species and adaptive management in  
315 response to changing selective pressures and emergence of new pathogen strains.

## 316 **4. Author statements**

### 317 **Authors and contributors**

318 Conceptualisation: KPW and RNZ. Isolate and data curation: KPW, CF, MAH and RNZ. Formal analysis,  
319 investigation, methodology, visualisation: CC. Supervision: TF, SL and RNZ. Writing original draft: CC  
320 and RNZ. Writing review & editing: CC, RNZ, TF, MAH, SL, KPW.

### 321 **Conflicts of interest**

322 The authors declare that they have no conflicts of interest.

### 323 **Funding information**

324 This work was funded by the University of Glasgow College of Medical, Veterinary and Life Sciences  
325 Doctoral Training Programme 2017-2021 (to CC). TF was supported by a Biotechnology and Biological  
326 Sciences Research Council (BBSRC) Discovery Fellowship (FORDE/BB/R012075/1). SL was supported  
327 by a University of Edinburgh Chancellor’s Fellowship and the BBSRC Institute Strategic Programme  
328 Grant: Control of Infectious Diseases BBS/E/D/20002173 to the Roslin Institute. MAH was funded by  
329 Medical Research Council awards MR/P007201/1 and MR/N002660/1.

## 330 **Acknowledgements**

331 We thank Ian Heron and John Bell from the Moredun Research Institute for laboratory assistance, Kirstyn  
332 Bruncker from the University of Glasgow for helping with the setup of Oxford Nanopore sequencing in the  
333 OHRBID laboratory, and Dr Ennio Lavagnini from the University of Cambridge for advice on development  
334 of the genome assembly pipeline for short paired-end reads.

## 335 **5. Data summary**

336 The authors confirm all supporting data, code and protocols have been provided within the article or  
337 through supplementary data files.

338

339 The scripts used for raw read assembly and genome quality control can be found in the supple-  
340 mentary file, available in the online version of this article.

341

342 Other external data used:

- 343 (1) 2603V/R, GenBank accession [NC\\_004116](#)
- 344 (2) Reference sequence Tn916 from *S. agalactiae* 2603V/R, [ICESag2603VR-1](#)
- 345 (3) Reference sequence Tn5801 from *S. agalactiae* COH1, [AAJR01000021.1](#)
- 346 (4) Plasmid pA996, [KC895877.1](#)
- 347 (5) Plasmid pW2580, [AY907345.1](#)

## 348 **References**

- 349 [1] **Seale AC, Bianchi-Jassir F, Russell NJ, Kohli-Lynch M, Tann CJ et al.** Estimates of the burden of  
350 group B streptococcal disease worldwide for pregnant women, stillbirths, and children. *Clin Infect Dis.*  
351 2017;65(suppl\_2):S200–S219 doi: 10.1093/cid/cix664.
- 352 [2] **Lyhs U, Kulkas L, Katholm J, Persson-Waller K, Saha K et al.** *Streptococcus agalactiae* serotype IV in  
353 humans and cattle, Northern Europe. *Emerg Infect Dis.* 2016;22(12):2097 doi: 10.3201/eid2212.151447.
- 354 [3] **Barkham T, Zadoks RN, Azmai MNA, Baker S, Bich VTN et al.** One hypervirulent clone, sequence type  
355 283, accounts for a large proportion of invasive *Streptococcus agalactiae* isolated from humans and diseased  
356 tilapia in Southeast Asia. *PLoS Negl Trop Dis.* 2019;13(6):e0007421 doi: 10.1371/journal.pntd.0007421.
- 357 [4] **Kwatra G, Cunnington MC, Merrall E, Adrian PV, Ip M et al.** Prevalence of maternal colonisation with

- 358 group B *Streptococcus*: a systematic review and meta-analysis. *Lancet Infect Dis*. 2016;16(9):1076–1084 doi:  
359 10.1016/S1473–3099(16)30055–X.
- 360 [5] **van der Mee-Marquet N, Fourny L, Arnault L, Domelier AS, Salloum M et al.** Molecular characterization  
361 of human-colonizing *Streptococcus agalactiae* strains isolated from throat, skin, anal margin, and genital body  
362 sites. *J Clin Microbiol*. 2008;46(9):2906–2911 doi: 10.1128/JCM.00421–08.
- 363 [6] **Cobo-Angel CG, Jaramillo-Jaramillo AS, Palacio-Aguilera M, Jurado-Vargas L, Calvo-Villegas EA et**  
364 **al.** Potential group B *Streptococcus* interspecies transmission between cattle and people in Colombian dairy  
365 farms. *Sci Rep*. 2019;9(1):1–9 doi: 10.1038/s41598–019–50225–w.
- 366 [7] **Davies MR, Tran TN, McMillan DJ, Gardiner DL, Currie BJ and Sriprakash KS.** Inter-species genetic  
367 movement may blur the epidemiology of streptococcal diseases in endemic regions. *Microbes Infect*. 2005;7(9-  
368 10):1128–1138 doi: 10.1016/j.micinf.2005.03.018.
- 369 [8] **Mweu MM, Nielsen S, Halasa T and Toft N.** Annual incidence, prevalence and transmission charac-  
370 teristics of *Streptococcus agalactiae* in Danish dairy herds. *Prev Vet Med*. 2012;106(3-4):244–250 doi:  
371 10.1016/j.prevetmed.2012.04.002.
- 372 [9] **Richards VP, Velsko IM, Alam T, Zadoks RN, Manning SD et al.** Population gene introgression and high  
373 genome plasticity for the zoonotic pathogen *Streptococcus agalactiae*. *Mol Biol Evo*. 2019;36(11):2572–2590  
374 doi: 10.1093/molbev/msz169.
- 375 [10] **Riekerink RGMO, Barkema HW, Scholl DT, Poole DE and Kelton DF.** Management practices asso-  
376 ciated with the bulk-milk prevalence of *Staphylococcus aureus* in Canadian dairy farms. *Prev Vet Med*.  
377 2010;97(1):20–28 doi: 10.1016/j.prevetmed.2010.07.002.
- 378 [11] **Zadoks RN and Fitzpatrick JL.** Changing trends in mastitis. *Ir Vet J*. 2009;62(4):1–12 doi: 10.1186/2046–  
379 0481–62–S4–S59.
- 380 [12] **Piepers S, De Meulemeester L, de Kruif A, Opsomer G, Barkema HW and De Vliegher S.** Prevalence  
381 and distribution of mastitis pathogens in subclinically infected dairy cows in Flanders, Belgium. *J Dairy Res*.  
382 2007;74(4):478–483 doi: 10.1017/S0022029907002841.
- 383 [13] **Pitkälä A, Haveri M, Pyörälä S, Myllys V and Honkanen-Buzalski T.** Bovine mastitis in Finland  
384 2001—prevalence, distribution of bacteria, and antimicrobial resistance. *J Dairy Sci*. 2004;87(8):2433–2441  
385 doi: 10.3168/jds.S0022–0302(04)73366–4.
- 386 [14] **Sampimon O, Barkema HW, Berends I, Sol J and Lam T.** Prevalence of intramammary infection in Dutch  
387 dairy herds. *J Dairy Res*. 2009;76(2):129–136 doi: 10.1017/S0022029908003762.
- 388 [15] **Heymann DL.** Control, elimination, eradication and re-emergence of infectious diseases: getting the message  
389 right. *Bull World Health Organ*. 2006;84(2):82 doi: 10.2471/blt.05.029512.
- 390 [16] **Bisharat N, Crook DW, Leigh J, Harding RM, Ward PN et al.** Hyperinvasive neonatal group B streptococ-  
391 cus has arisen from a bovine ancestor. *J Clin Microbiol*. 2004;42(5):2161–2167 doi: 10.1128/jcm.42.5.2161–

- 392 2167.2004.
- 393 [17] **Almeida A, Alves-Barroco C, Sauvage E, Bexiga R, Albuquerque P et al.** Persistence of a dominant  
394 bovine lineage of group B *Streptococcus* reveals genomic signatures of host adaptation. *Environ Microbiol.*  
395 2016;18(11):4216–4229 doi: 10.1111/1462–2920.13550.
- 396 [18] **Jørgensen HJ, Nordstoga AB, Sviland S, Zadoks RN, Sølvørød L et al.** *Streptococcus agalactiae*  
397 in the environment of bovine dairy herds—rewriting the textbooks? *Vet Microbiol.* 2016;184:64–72 doi:  
398 10.1016/j.vetmic.2015.12.014.
- 399 [19] **Weinert LA, Welch JJ, Suchard MA, Lemey P, Rambaut A and Fitzgerald JR.** Molecular dating of human-  
400 to-bovid host jumps by *Staphylococcus aureus* reveals an association with the spread of domestication. *Biol*  
401 *Lett.* 2012;8(5):829–832 doi: 10.1098/rsbl.2012.0290.
- 402 [20] **Zadoks RN, Middleton JR, McDougall S, Katholm J and Schukken YH.** Molecular epidemiology of mas-  
403 titis pathogens of dairy cattle and comparative relevance to humans. *J Mammary Gland Biol Neoplasia.*  
404 2011;16(4):357–372 doi: 10.1007/s10911–011–9236–y.
- 405 [21] **Smeds L and Künstner A.** ConDeTri—a content dependent read trimmer for Illumina data. *PLoS One.*  
406 2011;6(10):e26314 doi: 10.1371/journal.pone.0026314.
- 407 [22] **Bankevich A, Nurk S, Antipov D, Gurevich AA, Dvorkin M et al.** SPAdes: a new genome assem-  
408 bly algorithm and its applications to single-cell sequencing. *J Comput Biol.* 2012;19(5):455–477 doi:  
409 10.1089/cmb.2012.0021.
- 410 [23] **Gurevich A, Saveliev V, Vyahhi N and Tesler G.** QUAST: quality assessment tool for genome assemblies.  
411 *Bioinformatics.* 2013;(8):1072–1075 doi: 10.1093/bioinformatics/btt086.
- 412 [24] **Michael W, Olga B, Paul H, John BC, Yaroslav H et al.** Seaborn: statistical data visualization. Python Library  
413 Version 090. 2018.
- 414 [25] **Larsen MV, Cosentino S, Lukjancenko O, Saputra D, Rasmussen S et al.** Benchmarking of methods for  
415 genomic taxonomy. *J Clin Microbiol.* 2014;52(5):1529–1539.
- 416 [26] **Richards VP, Lang P, Bitar PDP, Lefébure T, Schukken YH et al.** Comparative genomics and the role  
417 of lateral gene transfer in the evolution of bovine adapted *Streptococcus agalactiae*. *Infect Genet Evol.*  
418 2011;11(6):1263–1275 doi: 10.1016/j.meegid.2011.04.019.
- 419 [27] **Jain M, Olsen HE, Paten B and Akeson M.** The Oxford Nanopore MinION: delivery of nanopore sequencing  
420 to the genomics community. *Genome Biol.* 2016;17(1):239 doi: 10.1186/s13059–016–1103–0.
- 421 [28] **Wick RR, Judd LM and Holt KE.** Performance of neural network basecalling tools for Oxford Nanopore  
422 sequencing. *Genome Biol.* 2019;20(1):129 doi: 10.1186/s13059–019–1727–y.
- 423 [29] **Wick RR, Judd LM, Gorrie CL and Holt KE.** Unicycler: resolving bacterial genome assemblies from short  
424 and long sequencing reads. *PLoS Comp Biol.* 2017;13(6):e1005595 doi: 10.1371/journal.pcbi.1005595.
- 425 [30] **Treangen TJ, Ondov BD, Koren S and Phillippy AM.** Rapid Core-Genome Alignment and Visualization for



- 426 Thousands of Microbial Genomes. *Genome Biol.* 2014;15(11):524 doi: 10.1186/s13059-014-0524-x.
- 427 [31] **Kozlov A, Darriba D, Flouri T, Morel B and Stamatakis A.** RAxML-NG: A fast, scalable, and user-friendly tool  
428 for maximum likelihood phylogenetic inference. *Bioinformatics.* 2019;35(21):4453–4455 doi: 10.1093/bioinfor-  
429 matics/btz305.
- 430 [32] **Letunic I and Bork P.** Interactive Tree Of Life (iTOL): an online tool for phylogenetic tree display and annota-  
431 tion. *Bioinformatics.* 2006;23(1):127–128 doi: 10.1093/bioinformatics/btl529.
- 432 [33] **Seemann T.** Prokka: rapid prokaryotic genome annotation. *Bioinformatics.* 2014;30(14):2068–2069 doi:  
433 10.1093/bioinformatics/btu153.
- 434 [34] **Page AJ, Cummins CA, Hunt M, Wong VK, Reuter S et al.** Roary: rapid large-scale prokaryote pan genome  
435 analysis. *Bioinformatics.* 2015;31(22):3691–3693 doi: 10.1093/bioinformatics/btv421.
- 436 [35] **Huson DH.** SplitsTree: analyzing and visualizing evolutionary data. *Bioinformatics.* 1998;14(1):68–73 doi:  
437 10.1093/bioinformatics/14.1.68.
- 438 [36] **Inouye M, Dashnow H, Raven LA, Schultz MB, Pope BJ et al.** SRST2: rapid genomic surveillance for public  
439 health and hospital microbiology labs. *Genome Med.* 2014;6(11):90 doi: 10.1186/s13073-014-0090-6.
- 440 [37] **Metcalf BJ, Chochua S, Gertz RE, Hawkins PA, Ricaldi J et al.** Short-read whole genome sequencing for  
441 determination of antimicrobial resistance mechanisms and capsular serotypes of current invasive *Streptococ-*  
442 *cus agalactiae* recovered in the USA. *Clin Microbiol Infect.* 2017;23(8):574–e7 doi: 10.1016/j.cmi.2017.02.021.
- 443 [38] **Da Cunha V, Davies MR, Douarre PE, Rosinski-Chupin I, Margarit I et al.** *Streptococcus agalactiae*  
444 clones infecting humans were selected and fixed through the extensive use of tetracycline. *Nat Commun.*  
445 2014;5:ncomms5544 doi: 10.1038/ncomms5544.
- 446 [39] **Sheppard AE, Vaughan A, Jones N, Turner P, Turner C et al.** Capsular typing method for *Strep-*  
447 *tococcus agalactiae* using whole-genome sequence data. *J Clin Microbiol.* 2016;54(5):1388–1390 doi:  
448 10.1128/JCM.03142-15.
- 449 [40] **Zankari E, Hasman H, Cosentino S, Vestergaard M, Rasmussen S et al.** Identification of acquired antimi-  
450 crobial resistance genes. *J Antimicrob Chemother.* 2012;67(11):2640–2644 doi: 10.1093/jac/dks261.
- 451 [41] **Sørensen UBS, Klaas IC, Boes J and Farre M.** The distribution of clones of *Streptococcus agalactiae* (group  
452 B streptococci) among herdspersons and dairy cows demonstrates lack of host specificity for some lineages.  
453 *Vet Microbiol.* 2019;235:71–79 doi: 10.1016/j.vetmic.2019.06.008.
- 454 [42] **Zeng L, Das S and Burne RA.** Utilization of lactose and galactose by *Streptococcus mutans*: transport,  
455 toxicity, and carbon catabolite repression. *J Bacteriol.* 2010;192(9):2434–2444 doi: 10.1128/JB.01624-09.
- 456 [43] **Liu M, Li X, Xie Y, Bi D, Sun J et al.** ICEberg 2.0: an updated database of bacterial integrative and conjugative  
457 elements. *Nucleic Acids Res.* 2018;47(D1):D660–D665 doi: 10.1093/nar/gky1123.
- 458 [44] **Hunt M, Mather AE, Sánchez-Busó L, Page AJ, Parkhill J et al.** ARIBA: rapid antimicrobial resistance  
459 genotyping directly from sequencing reads. *Microb Genom.* 2017;3(10):e000131 doi: 10.1099/mgen.0.000131.

- 460 [45] **Katoh K and Standley DM.** MAFFT multiple sequence alignment software version 7: improvements in perfor-  
461 mance and usability. *Mol Biol Evol.* 2013;30(4):772–780 doi: 10.1093/molbev/mst010.
- 462 [46] **Kearse M, Moir R, Wilson A, Stones-Havas S, Cheung M et al.** Geneious Basic: an integrated and  
463 extendable desktop software platform for the organization and analysis of sequence data. *Bioinformatics.*  
464 2012;28(12):1647–1649 doi: 10.1093/bioinformatics/bts199.
- 465 [47] **Li L, Wang R, Huang Y, Huang T, Luo F et al.** High incidence of pathogenic *Streptococcus agalactiae*  
466 ST485 strain in pregnant/puerperal women and isolation of hyper-virulent human CC67 strain. *Front Microbiol.*  
467 2018;9:50 doi: 10.3389/fmicb.2018.00050.
- 468 [48] **Luan SL, Granlund M, Sellin M, Lagergård T, Spratt BG and Norgren M.** Multilocus sequence typing  
469 of Swedish invasive group B *Streptococcus* isolates indicates a neonatally associated genetic lineage and  
470 capsule switching. *J Clin Microbiol.* 2005;43(8):3727–3733 doi: 10.1128/JCM.43.8.3727–3733.2005.
- 471 [49] **Boonyayatra S, Wongsathein D and Tharavichitkul P.** Genetic relatedness among *Streptococcus*  
472 *agalactiae* isolated from cattle, fish, and humans. *Foodborne Pathog Dis.* 2019;17(2):137–143 doi:  
473 10.1089/fpd.2019.2687.
- 474 [50] **Hsu JF, Chen CL, Lee CC, Lien R, Chu SM et al.** Characterization of group B *Streptococcus* col-  
475 onization in full-term and late-preterm neonates in Taiwan. *Pediatr Neonatol.* 2019;60(3):311–317 doi:  
476 10.1016/j.pedneo.2018.07.015.
- 477 [51] **Wu B, Su J, Li L, Wu W, Wu J et al.** Phenotypic and genetic differences among group B *Streptococcus* recov-  
478 ered from neonates and pregnant women in Shenzhen, China: 8-year study. *BMC Microbiol.* 2019;19(1):185  
479 doi: 10.1186/s12866-019-1551-2.
- 480 [52] **Yang Y, Liu Y, Ding Y, Yi L, Ma Z et al.** Molecular characterization of *Streptococcus agalactiae* isolated from  
481 bovine mastitis in Eastern China. *PLoS One.* 2013;8(7):e67755 doi: 10.1371/journal.pone.0067755.
- 482 [53] **European Medicines Agency (EMA).** Sales of veterinary antimicrobial agents in 31 European countries in  
483 2017 - Trends from 2010 to 2017. EMA/294674/2019. 2019.
- 484 [54] **Bergmann R, Nerlich A, Chhatwal GS and Nitsche-Schmitz DP.** Distribution of small native  
485 plasmids in *Streptococcus pyogenes* in India. *Int J Med Microbiol.* 2014;304(3-4):370–378 doi:  
486 10.1016/j.ijmm.2013.12.001.
- 487 [55] **Smith JA and Magnuson RD.** Modular organization of the Phd repressor/antitoxin protein. *J Bacteriol.*  
488 2004;186(9):2692–2698 doi: 10.1128/jb.186.9.2692–2698.2004.
- 489 [56] **Heng NCK, Ragland NL, Swe PM, Baird HJ, Inglis MA et al.** Dysgalacticin: a novel, plasmid-encoded  
490 antimicrobial protein (bacteriocin) produced by *Streptococcus dysgalactiae* subsp. *equisimilis*. *Microbiology.*  
491 2006;152(Pt 7):1991–2001 doi: 10.1099/mic.0.28823-0.
- 492 [57] **Swe PM, Heng NCK, Cook GM, Tagg JR and Jack RW.** Identification of DysI, the immunity factor of the strep-  
493 tococcal bacteriocin dysgalacticin. *Appl Environ Microbiol.* 2010;76(23):7885–7889 doi: 10.1128/AEM.01707–

- 494 10.
- 495 [58] **Dogan B, Schukken YH, Santisteban C and Boor KJ.** Distribution of serotypes and antimicrobial re-  
496 sistance genes among *Streptococcus agalactiae* isolates from bovine and human hosts. *J Clin Microbiol.*  
497 2005;43(12):5899–5906 doi: 10.1128/JCM.43.12.5899–5906.2005.
- 498 [59] **Leal CAG, Queiroz GA, Pereira FL, Tavares GC and Figueiredo HCP.** *Streptococcus agalactiae* sequence  
499 type 283 in farmed fish, Brazil. *Emerg Infect Dis.* 2019;25(4):776 doi: 10.3201/eid2504.180543.
- 500 [60] **Delannoy CMJ, Crumlish M, Fontaine MC, Pollock J, Foster G et al.** Human *Streptococcus agalactiae*  
501 strains in aquatic mammals and fish. *BMC Microbiol.* 2013;13:41 doi: 10.1186/1471–2180–13–41.
- 502 [61] **Lowder BV, Guinane CM, Zakour NLB, Weinert LA, Conway-Morris A et al.** Recent human-to-poultry host  
503 jump, adaptation, and pandemic spread of *Staphylococcus aureus*. *PNAS.* 2009;106(46):19545–19550.
- 504 [62] **Shepherd MA, Fleming VM, Connor TR, Corander J, Feil EJ et al.** Historical zoonoses and other changes  
505 in host tropism of *Staphylococcus aureus*, identified by phylogenetic analysis of a population dataset. *PLoS*  
506 *One.* 2013;8(5):e62369.
- 507 [63] **Katholm J, Bennedsgaard TW, Koskinen MT and Rattenborg E.** Quality of bulk tank milk samples from  
508 Danish dairy herds based on real-time polymerase chain reaction identification of mastitis pathogens. *J Dairy*  
509 *Sci.* 2012;95(10):5702–5708.
- 510 [64] **Nesbø CL, Dlutek M and Doolittle WF.** Recombination in *Thermotoga*: implications for species concepts and  
511 biogeography. *Genetics.* 2006;172(2):759–769.

512 **6. Figures and tables**

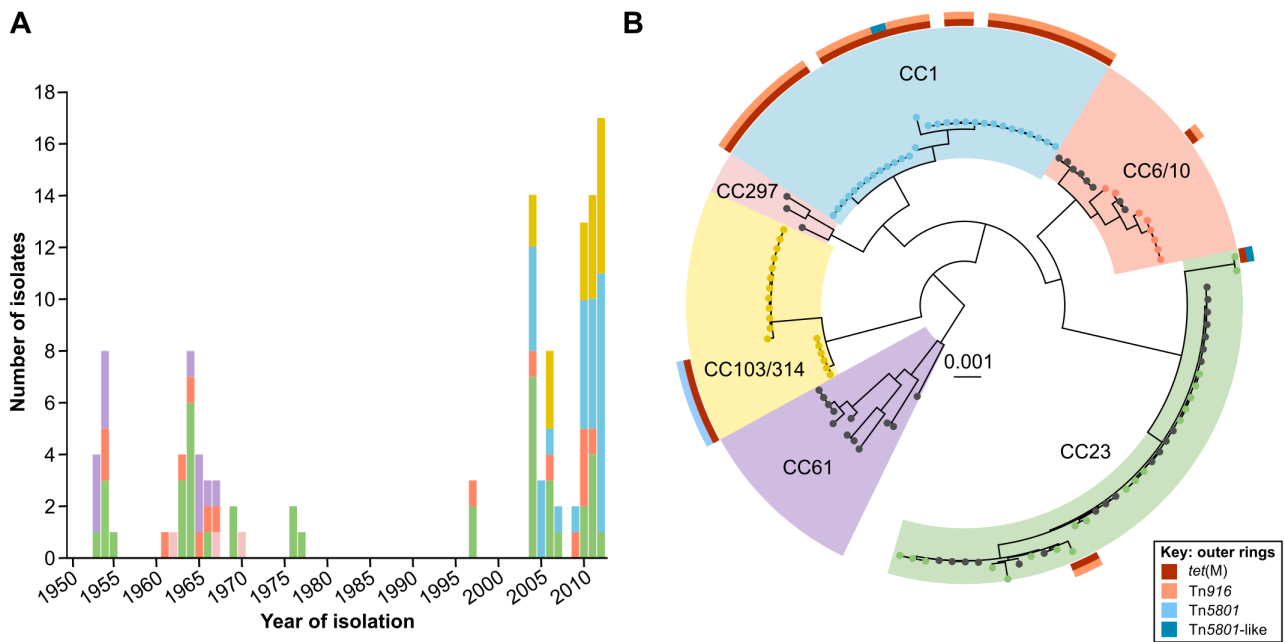

**Figure 1.** Control and re-emergence of group B *Streptococcus* (GBS) is associated with strain replacement. A) Frequency distribution of 120 GBS isolates from bovine milk, collected from 1953 to 1977 ( $n = 44$ ) and 1997 to 2012 ( $n = 76$ ), shows presence of six clonal complexes (CC; colour as indicated in panel B). Bovine-specific GBS lineage CC61 (purple) was last detected prior to 1970. Re-emergence of GBS in the Swedish dairy cattle population after a period of near-elimination is associated with CC1 (blue) and CC103/314 (yellow), which were first detected in 2004. Lineages CC23 (green) and CC6/10 (orange), which are also commonly found in other host species, were detected among historical and contemporary isolates. B) Tetracycline resistance, a marker of adaptation of GBS to humans, was detected exclusively among contemporary bovine GBS isolates. The core genome phylogeny of historical and contemporary isolates (black and coloured leaves, respectively) is shown, with clonal complex (CC) and presence of *tet*(M) and integrative conjugative elements (ICE), namely Tn916, Tn5801 and Tn5801-like. *tet*(M) was carried by Tn5801 in all ST314 isolates, and mostly by Tn916 among CC1 isolates. One ST28 isolate from 1978 did not belong to any of the major clades and is not shown. Tree was rooted at midpoint.

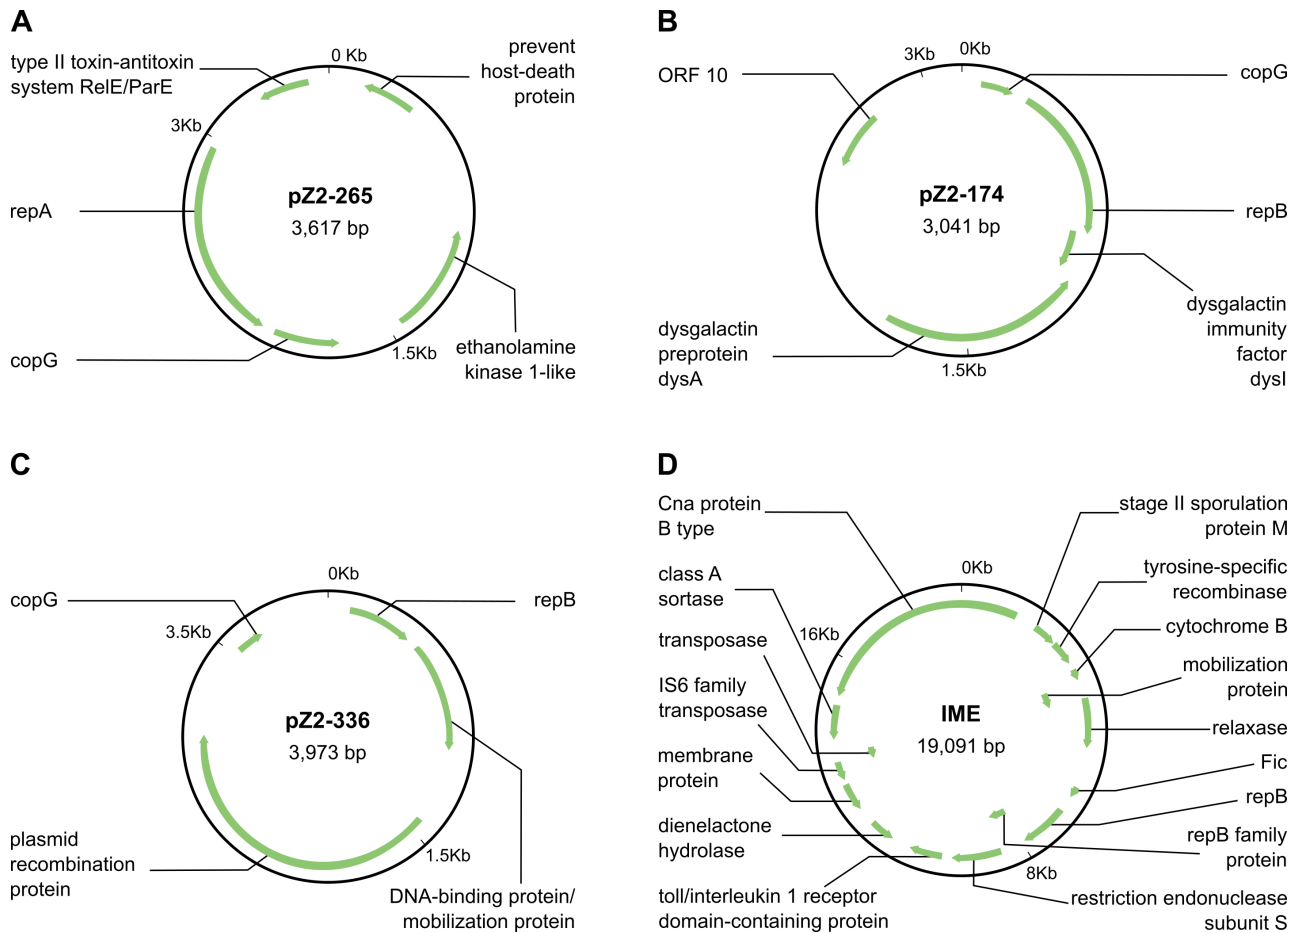

**Figure 2.** Hybrid Illumina-MinION assemblies of bovine group B *Streptococcus* (GBS) revealed the presence of plasmids and integrative mobilizable elements (IME). A) Plasmid pZ2-265 has 99.28% homology to plasmid pA996 ([KC895877.1](https://doi.org/10.1101/2021.04.21.440740)) from *Streptococcus pyogenes* or group A *Streptococcus*, GAS. B) Plasmid pZ2-174 shows 98.85% homology to pW2580 ([AY907345.1](https://doi.org/10.1101/2021.04.21.440740)) from *Streptococcus dysgalactiae* subsp. *equisimilis* or group G *Streptococcus*, GGS. C) pZ2-336 did not show significant similarity with known plasmids, whilst a second circular element in the same genome assembly (D) could either belong to a novel unclassified mobile genetic element family or be an IME.

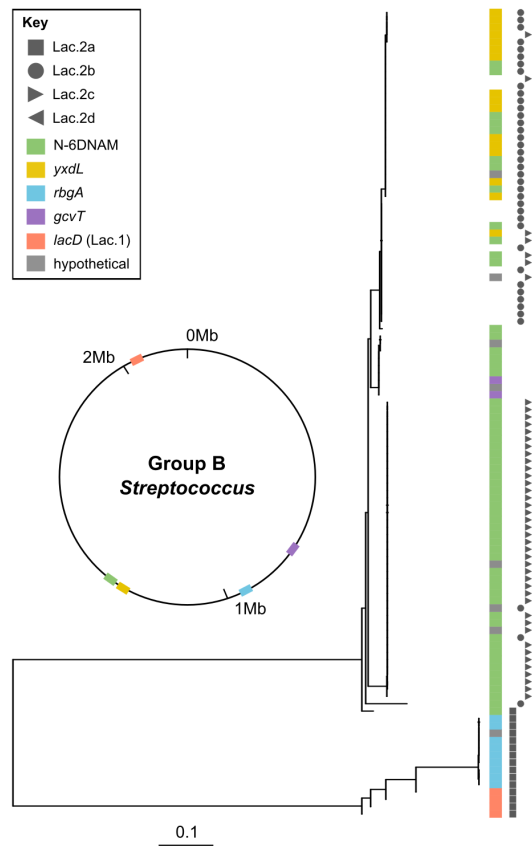

**Figure 3.** Phylogeny of the Lac.2 integrase amino acid sequences from bovine group B *Streptococcus* (GBS), with their insertion site (coloured strip) and Lac.2 variant (symbols), illustrating the plasticity of the accessory genome. Insertion sites have been mapped on an example GBS genome. Gene *yxdL* was found in multiple copies within the same genome, with Lac.2 detected next to the copy present in the region around 1.25 Mbp. When Lac.2 was found at the edge of a contig, it was not possible to determine the site of integration ( $n = 13$ , blank colour strip) and the integrase sequence ( $n = 10$ , not present in tree).

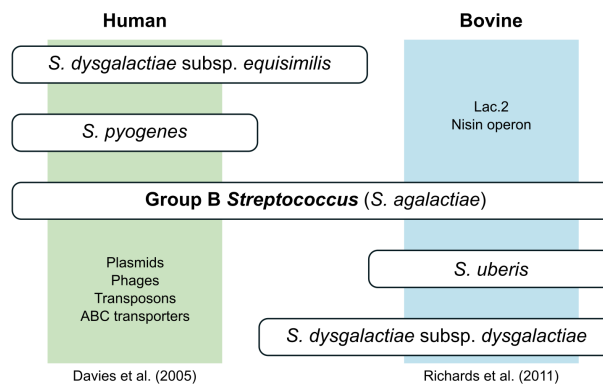

**Figure 4.** Schematic representation of the relationship between bacterial species and host species. The bacterial core genome defines bacterial species identity whereas the bacterial accessory genome drives and is driven by the host species inhabited by the bacteria. Acquisition of host-associated mobile genetic elements through lateral transfer between pyogenic streptococcal species in one host, as described for phages, transposons, and transporters in humans [7], and for lactose and nisin operons in cattle [26], followed by transmission between host species, may explain the detection of human-associated accessory genome content in bovine group B *Streptococcus* as observed in this study for tetracycline resistance and plasmids.



**A**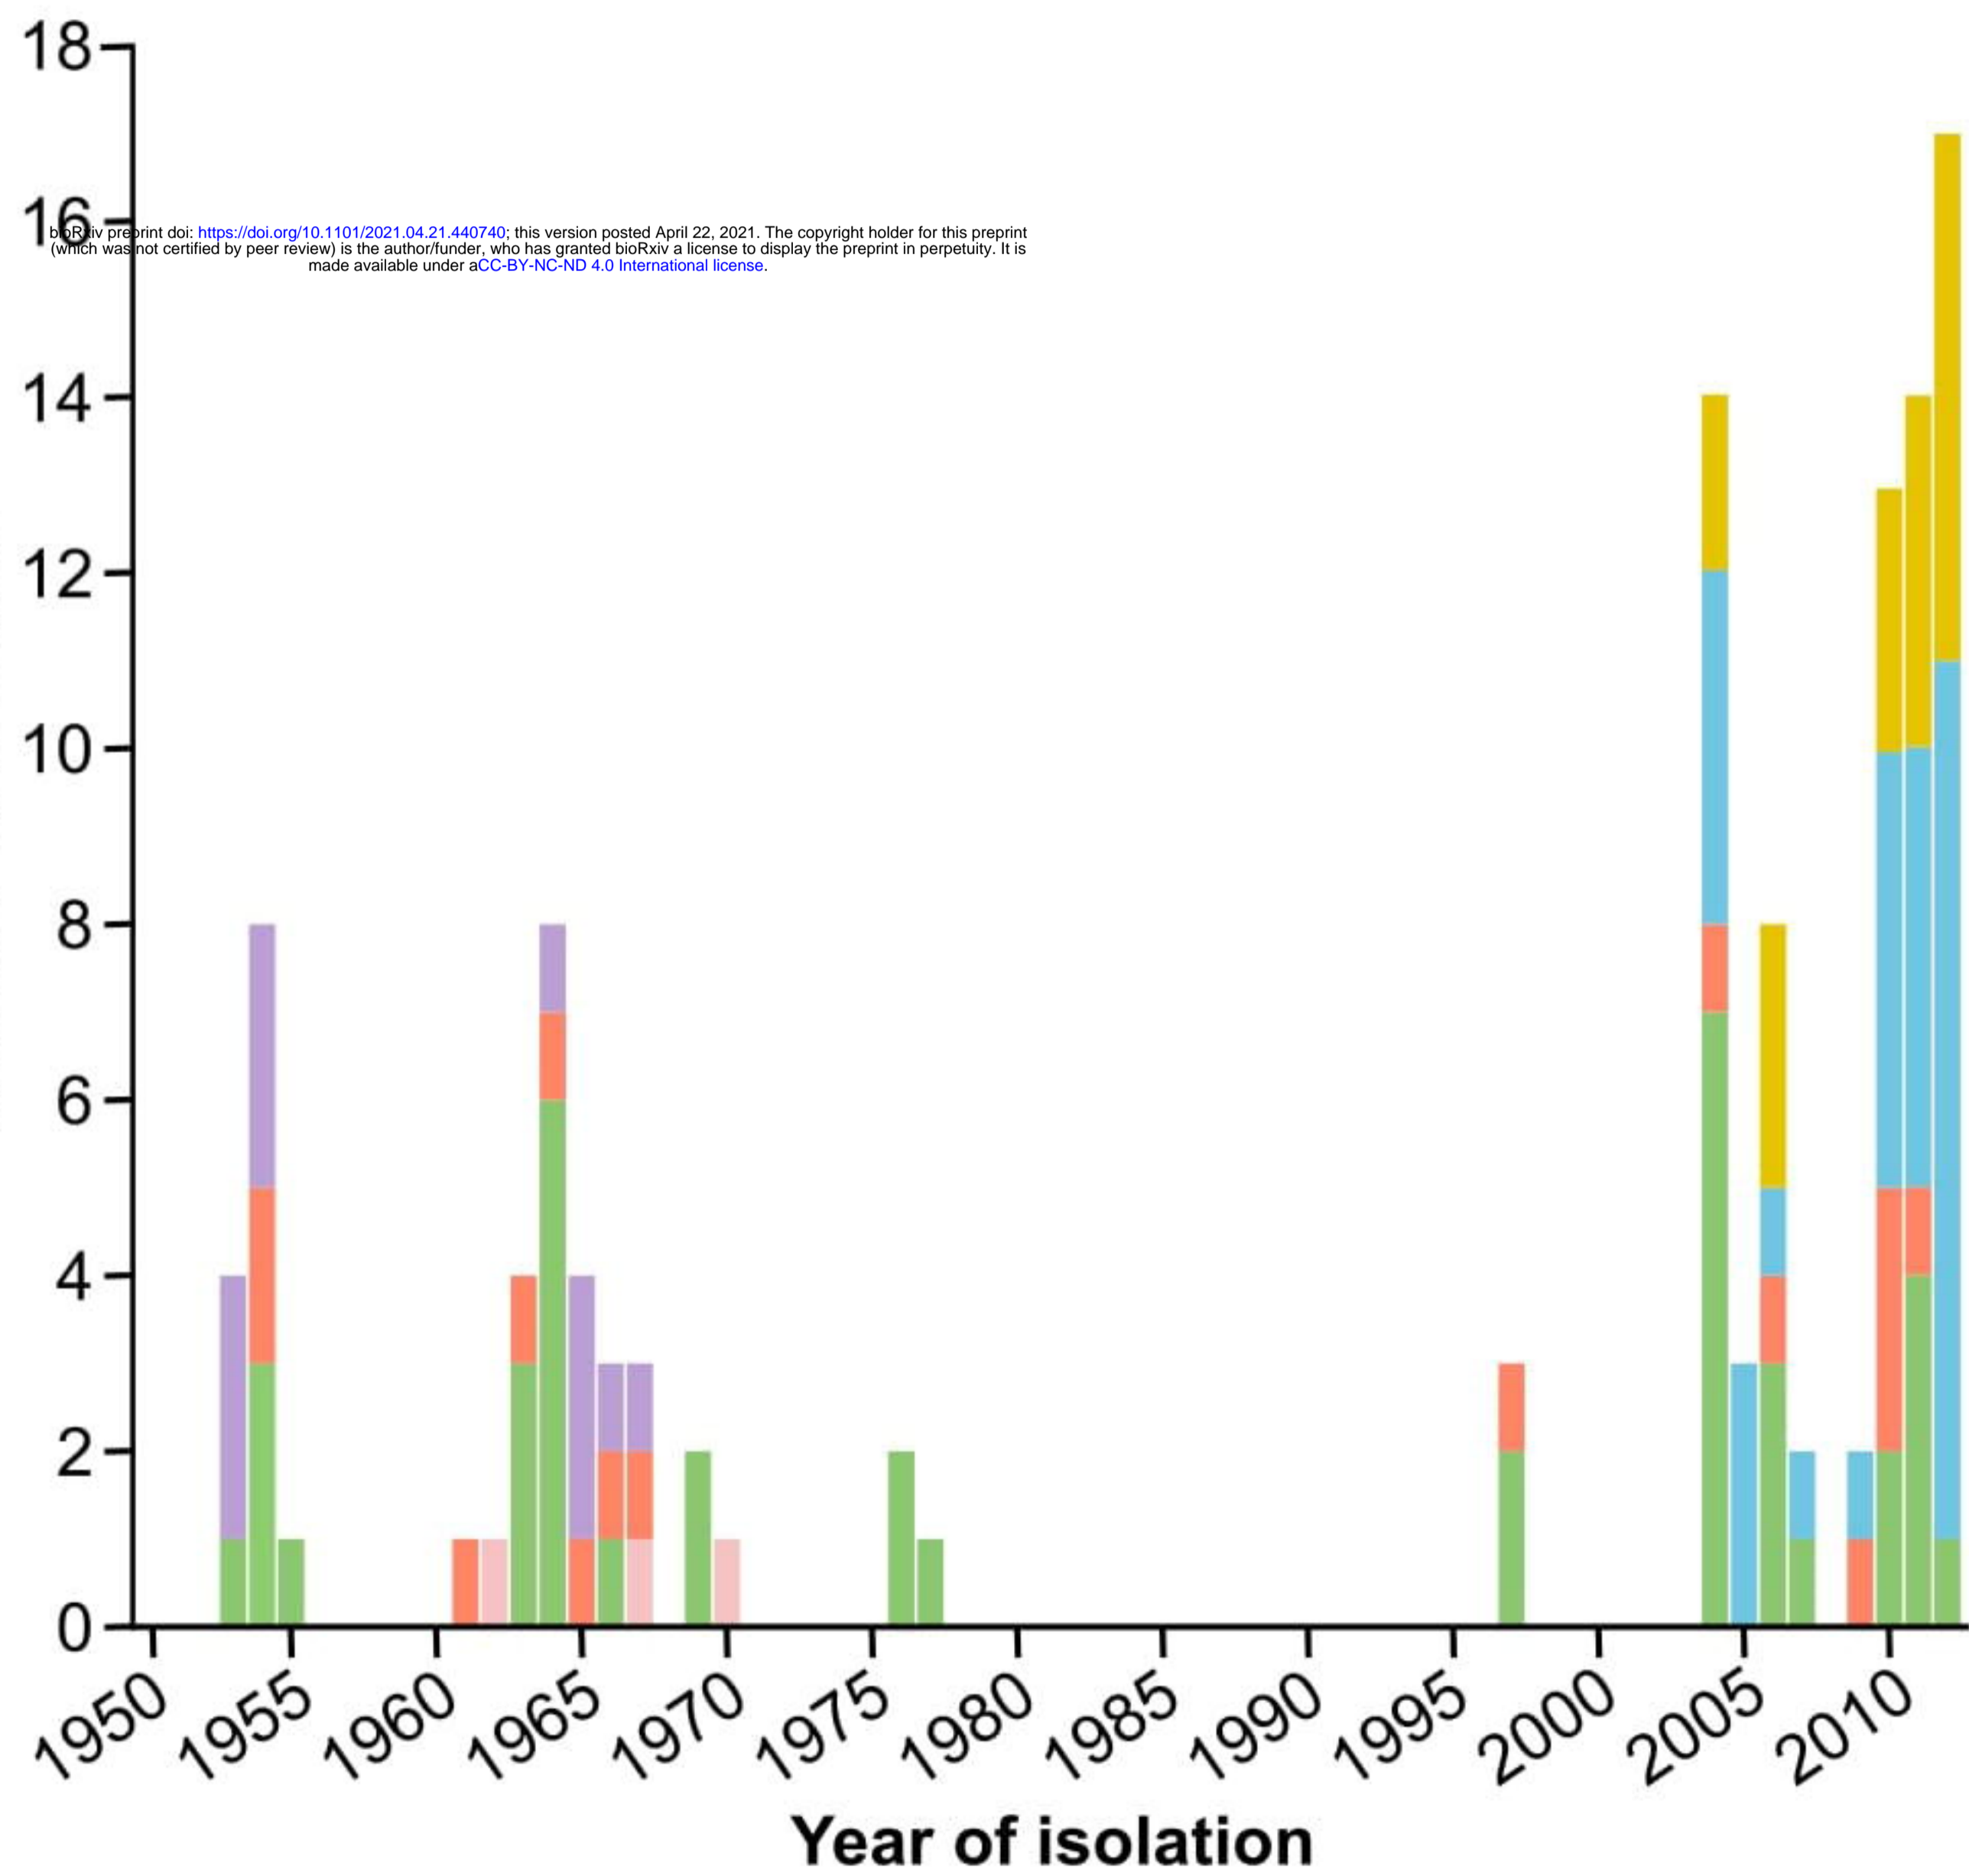**B**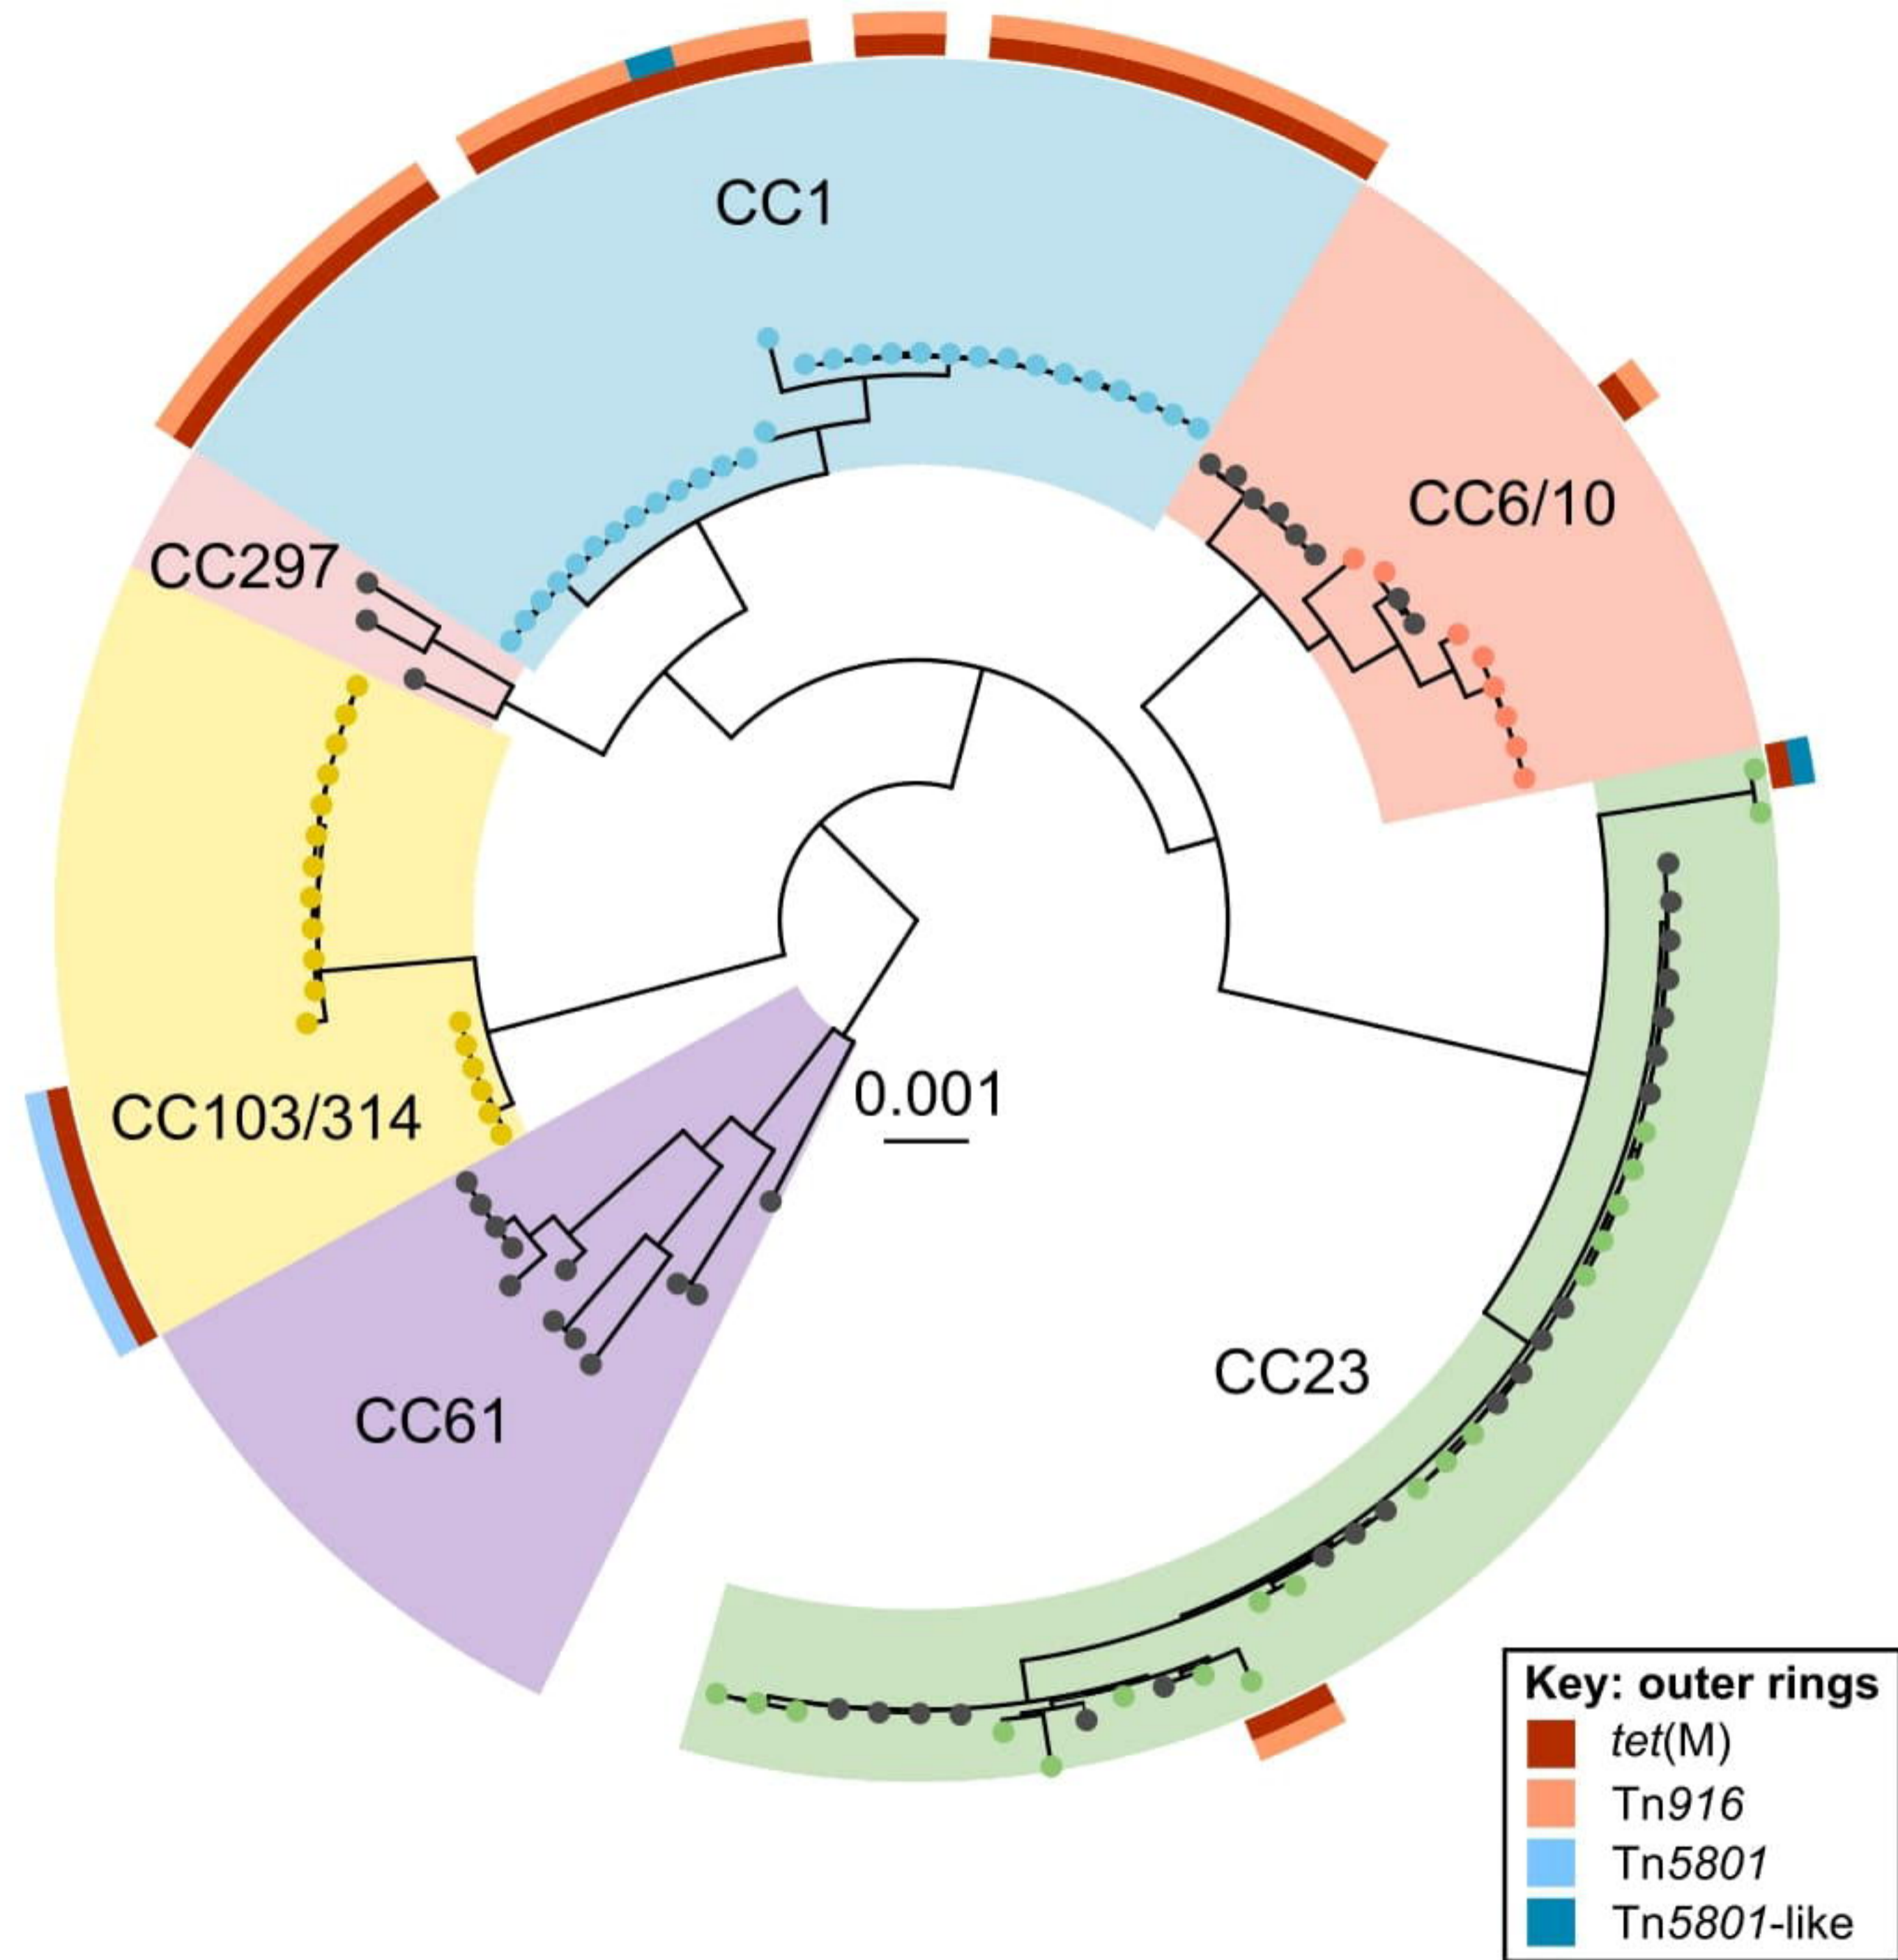



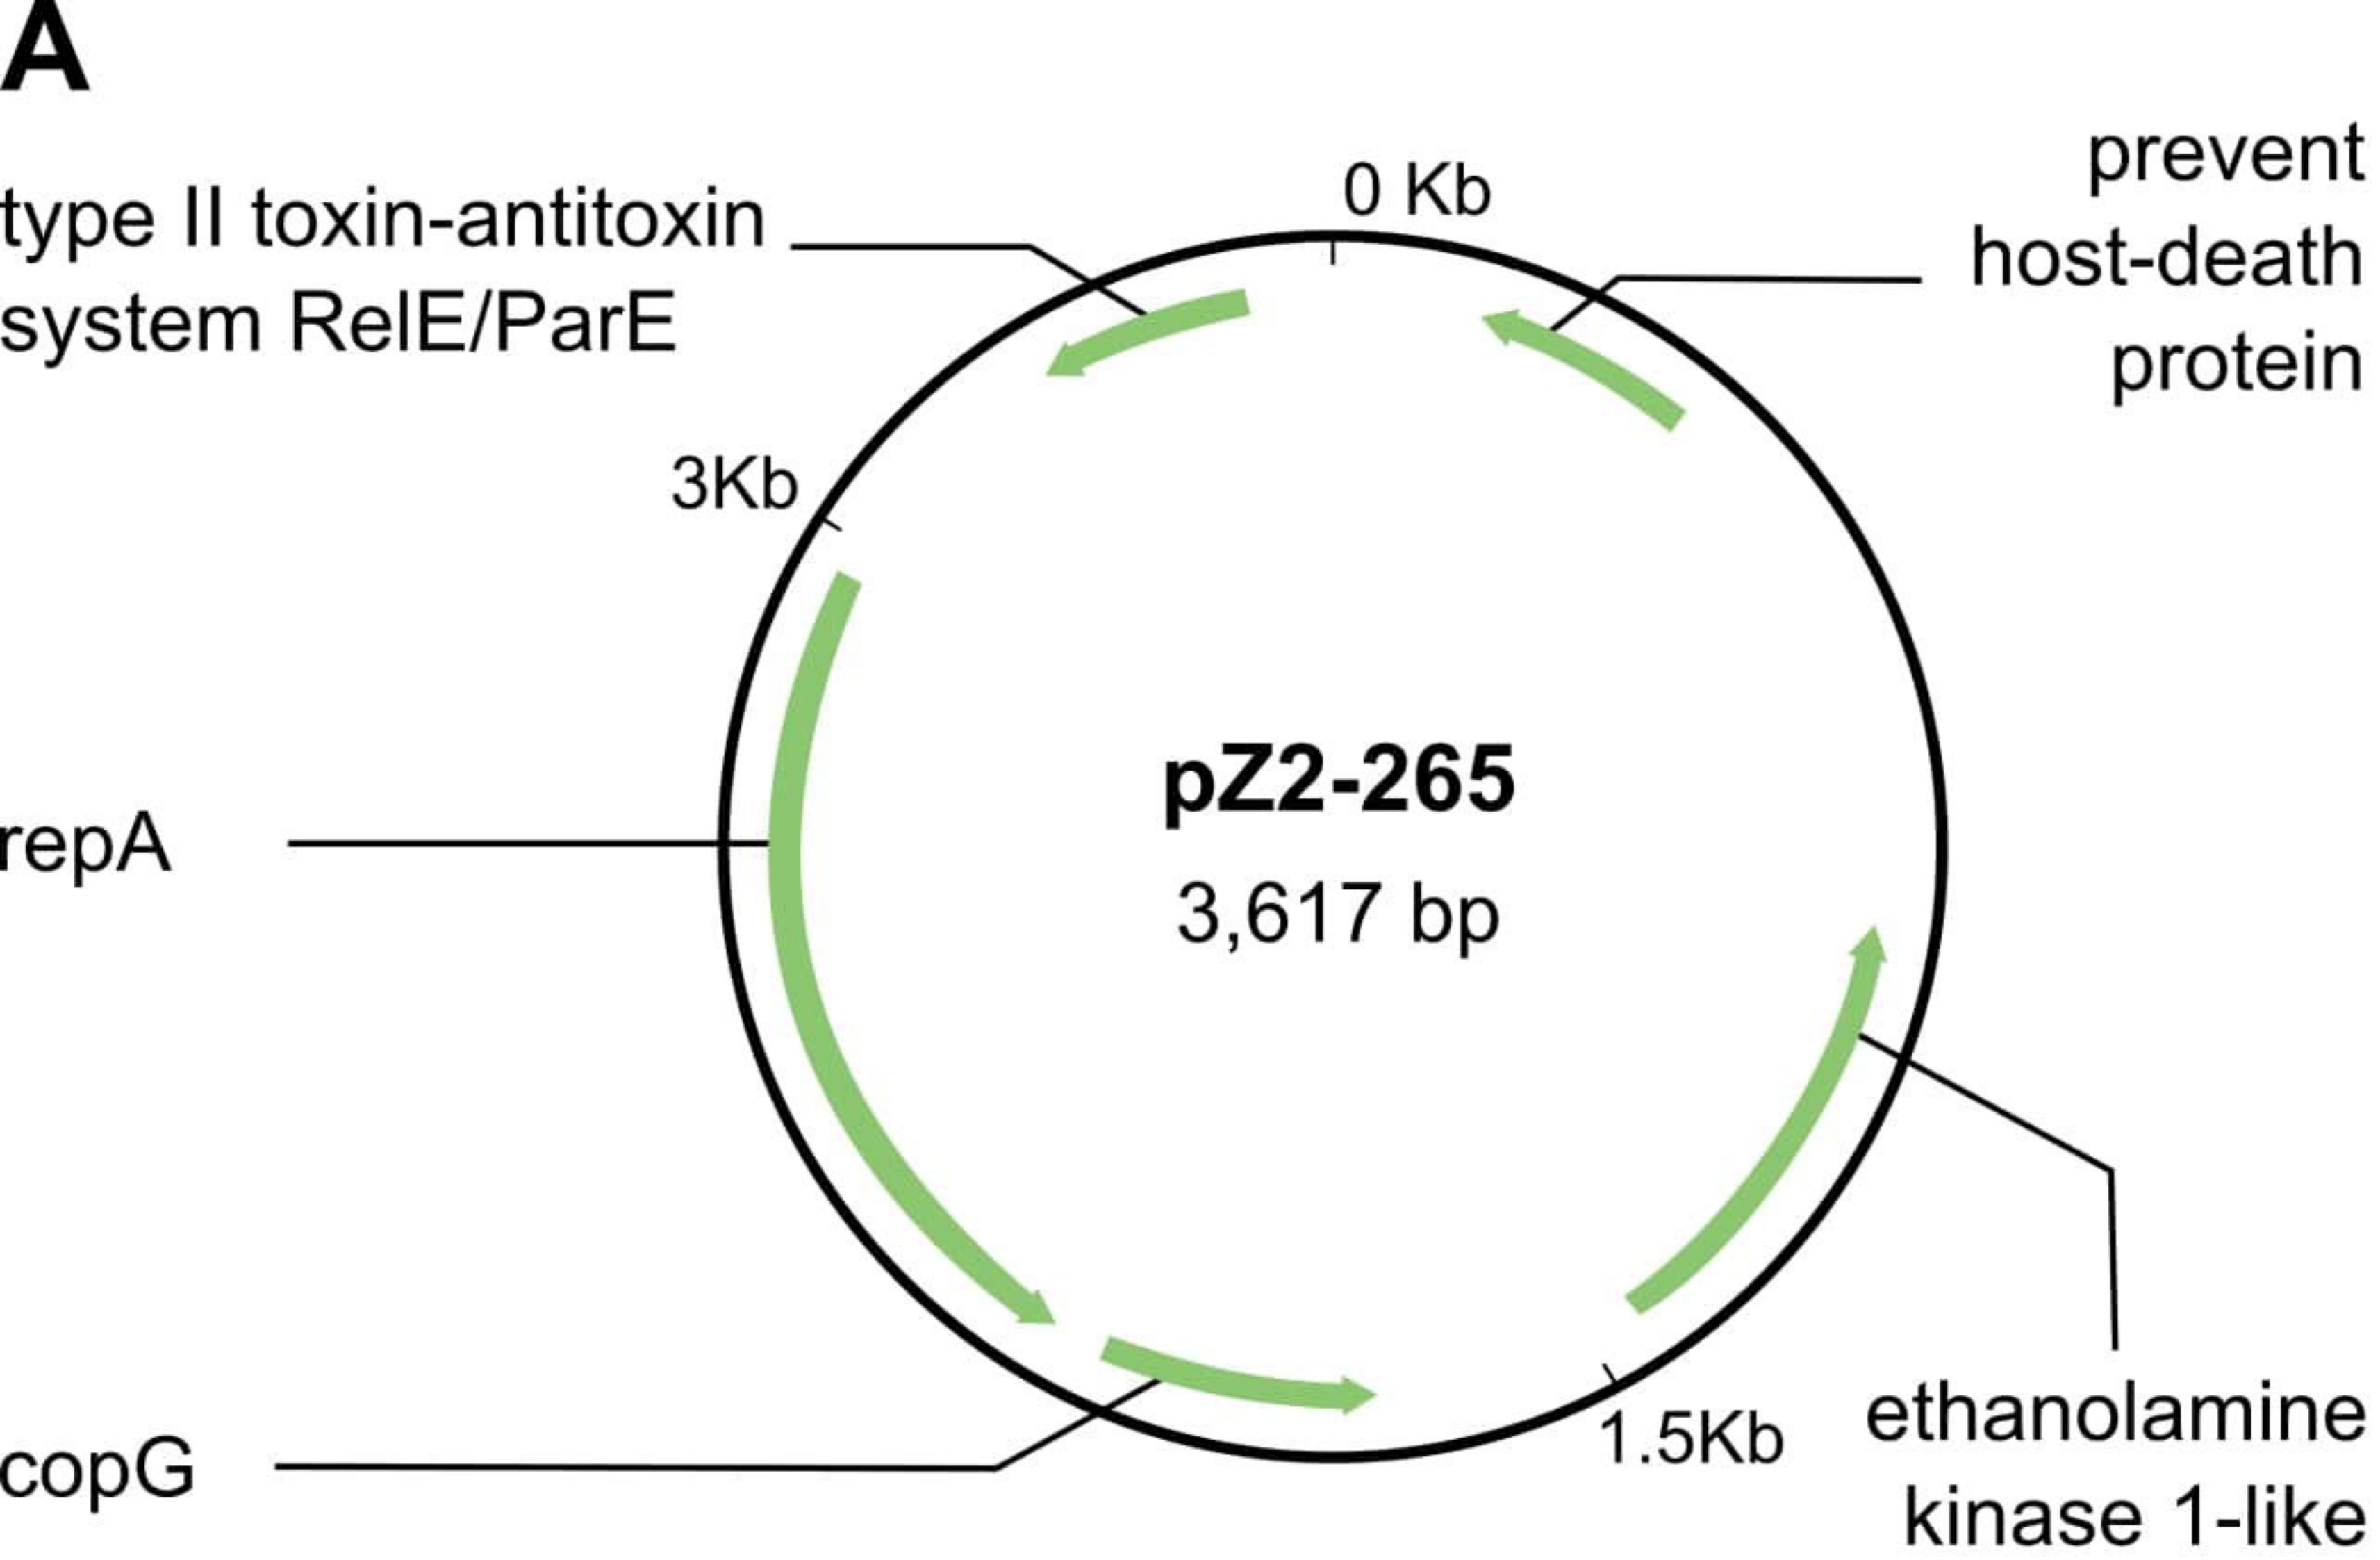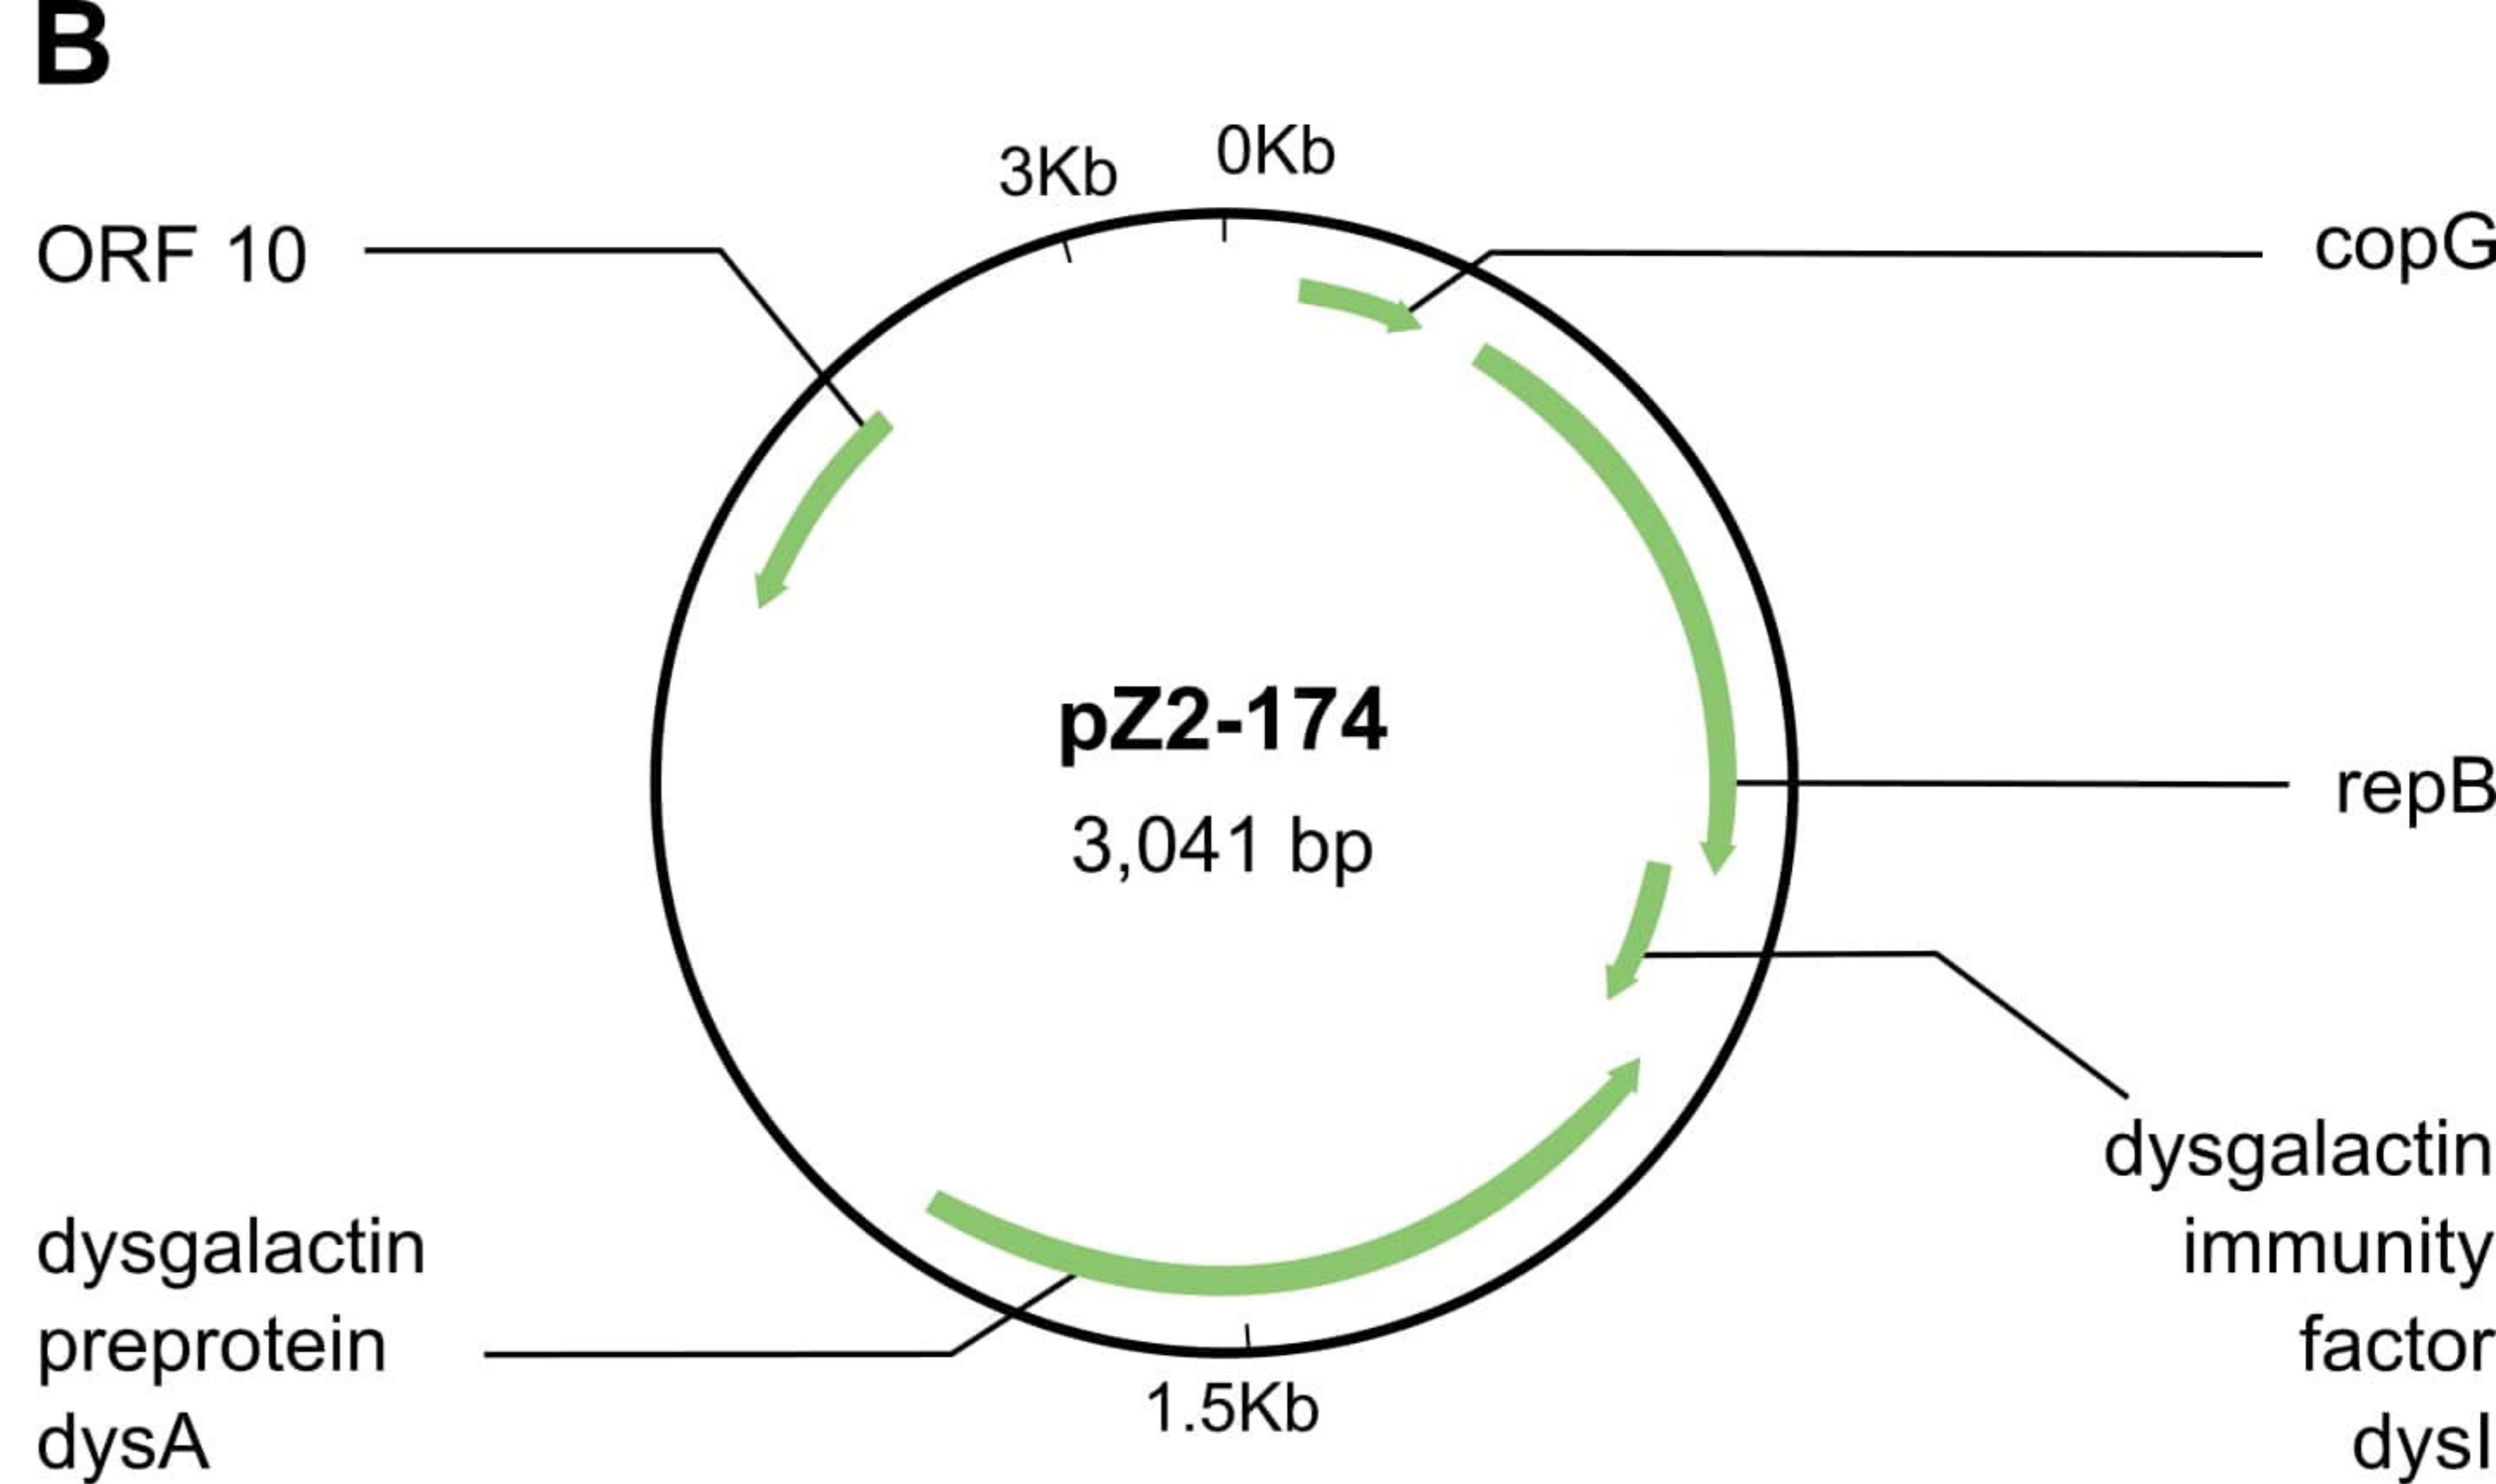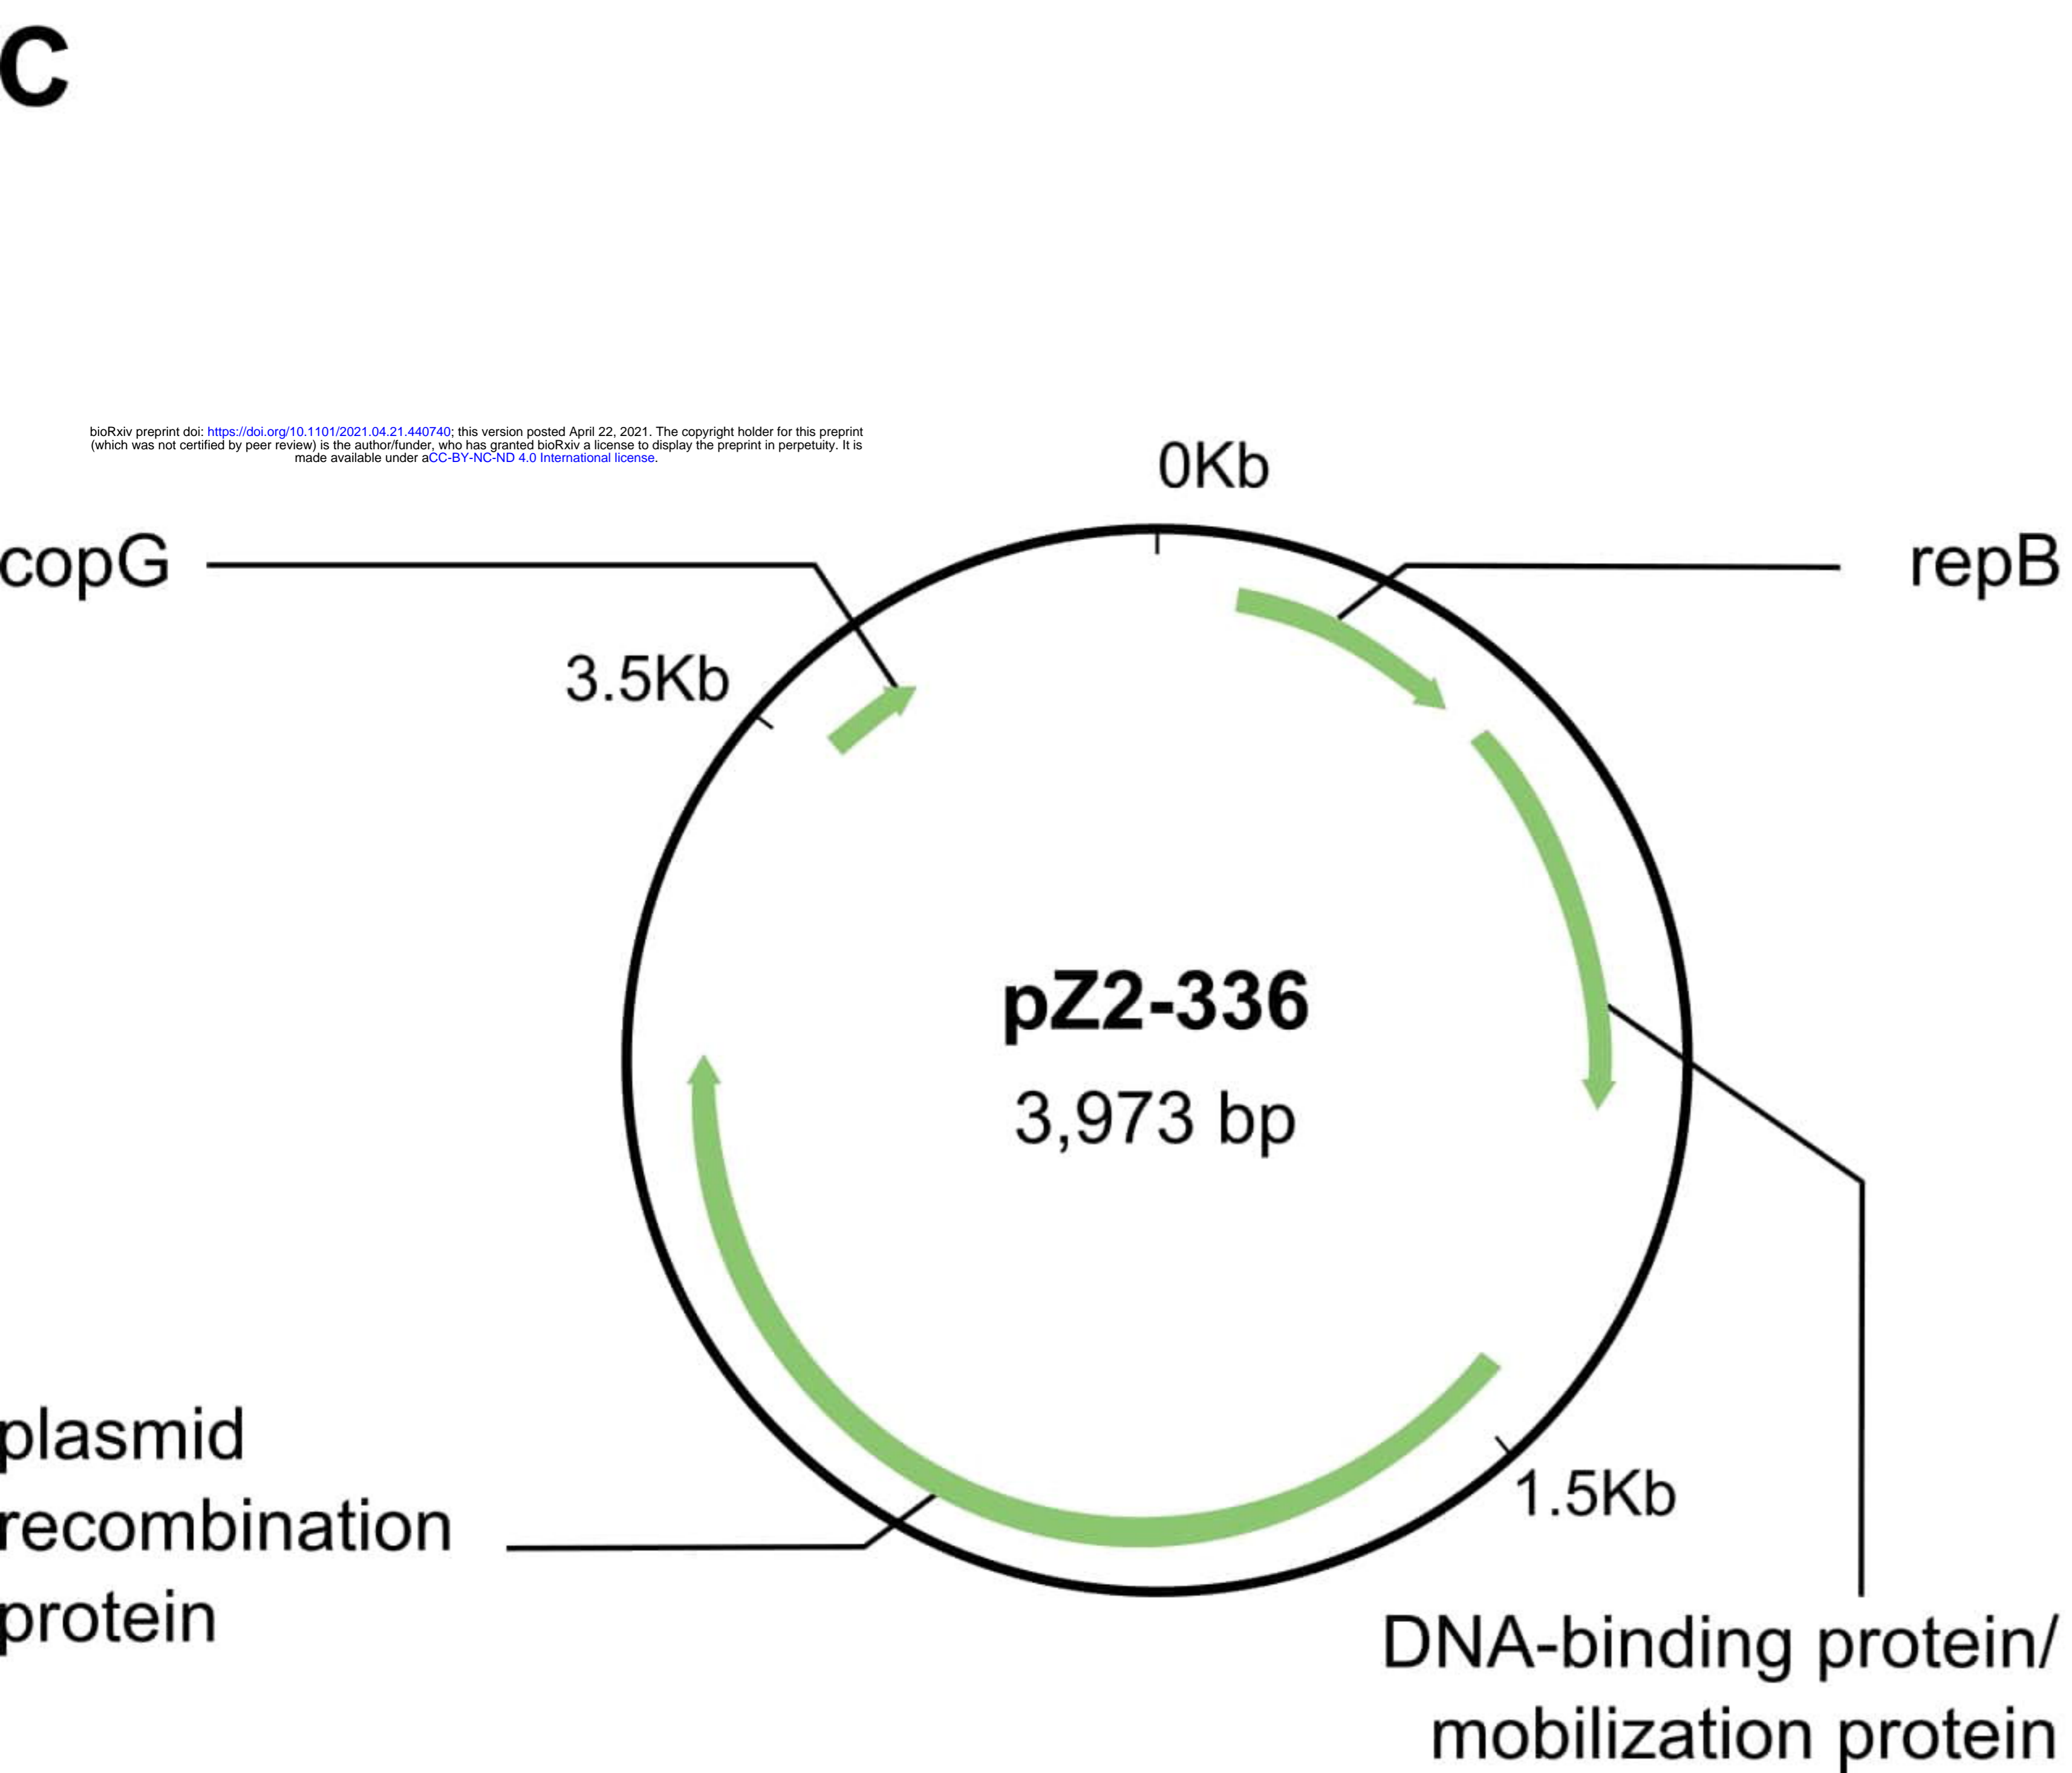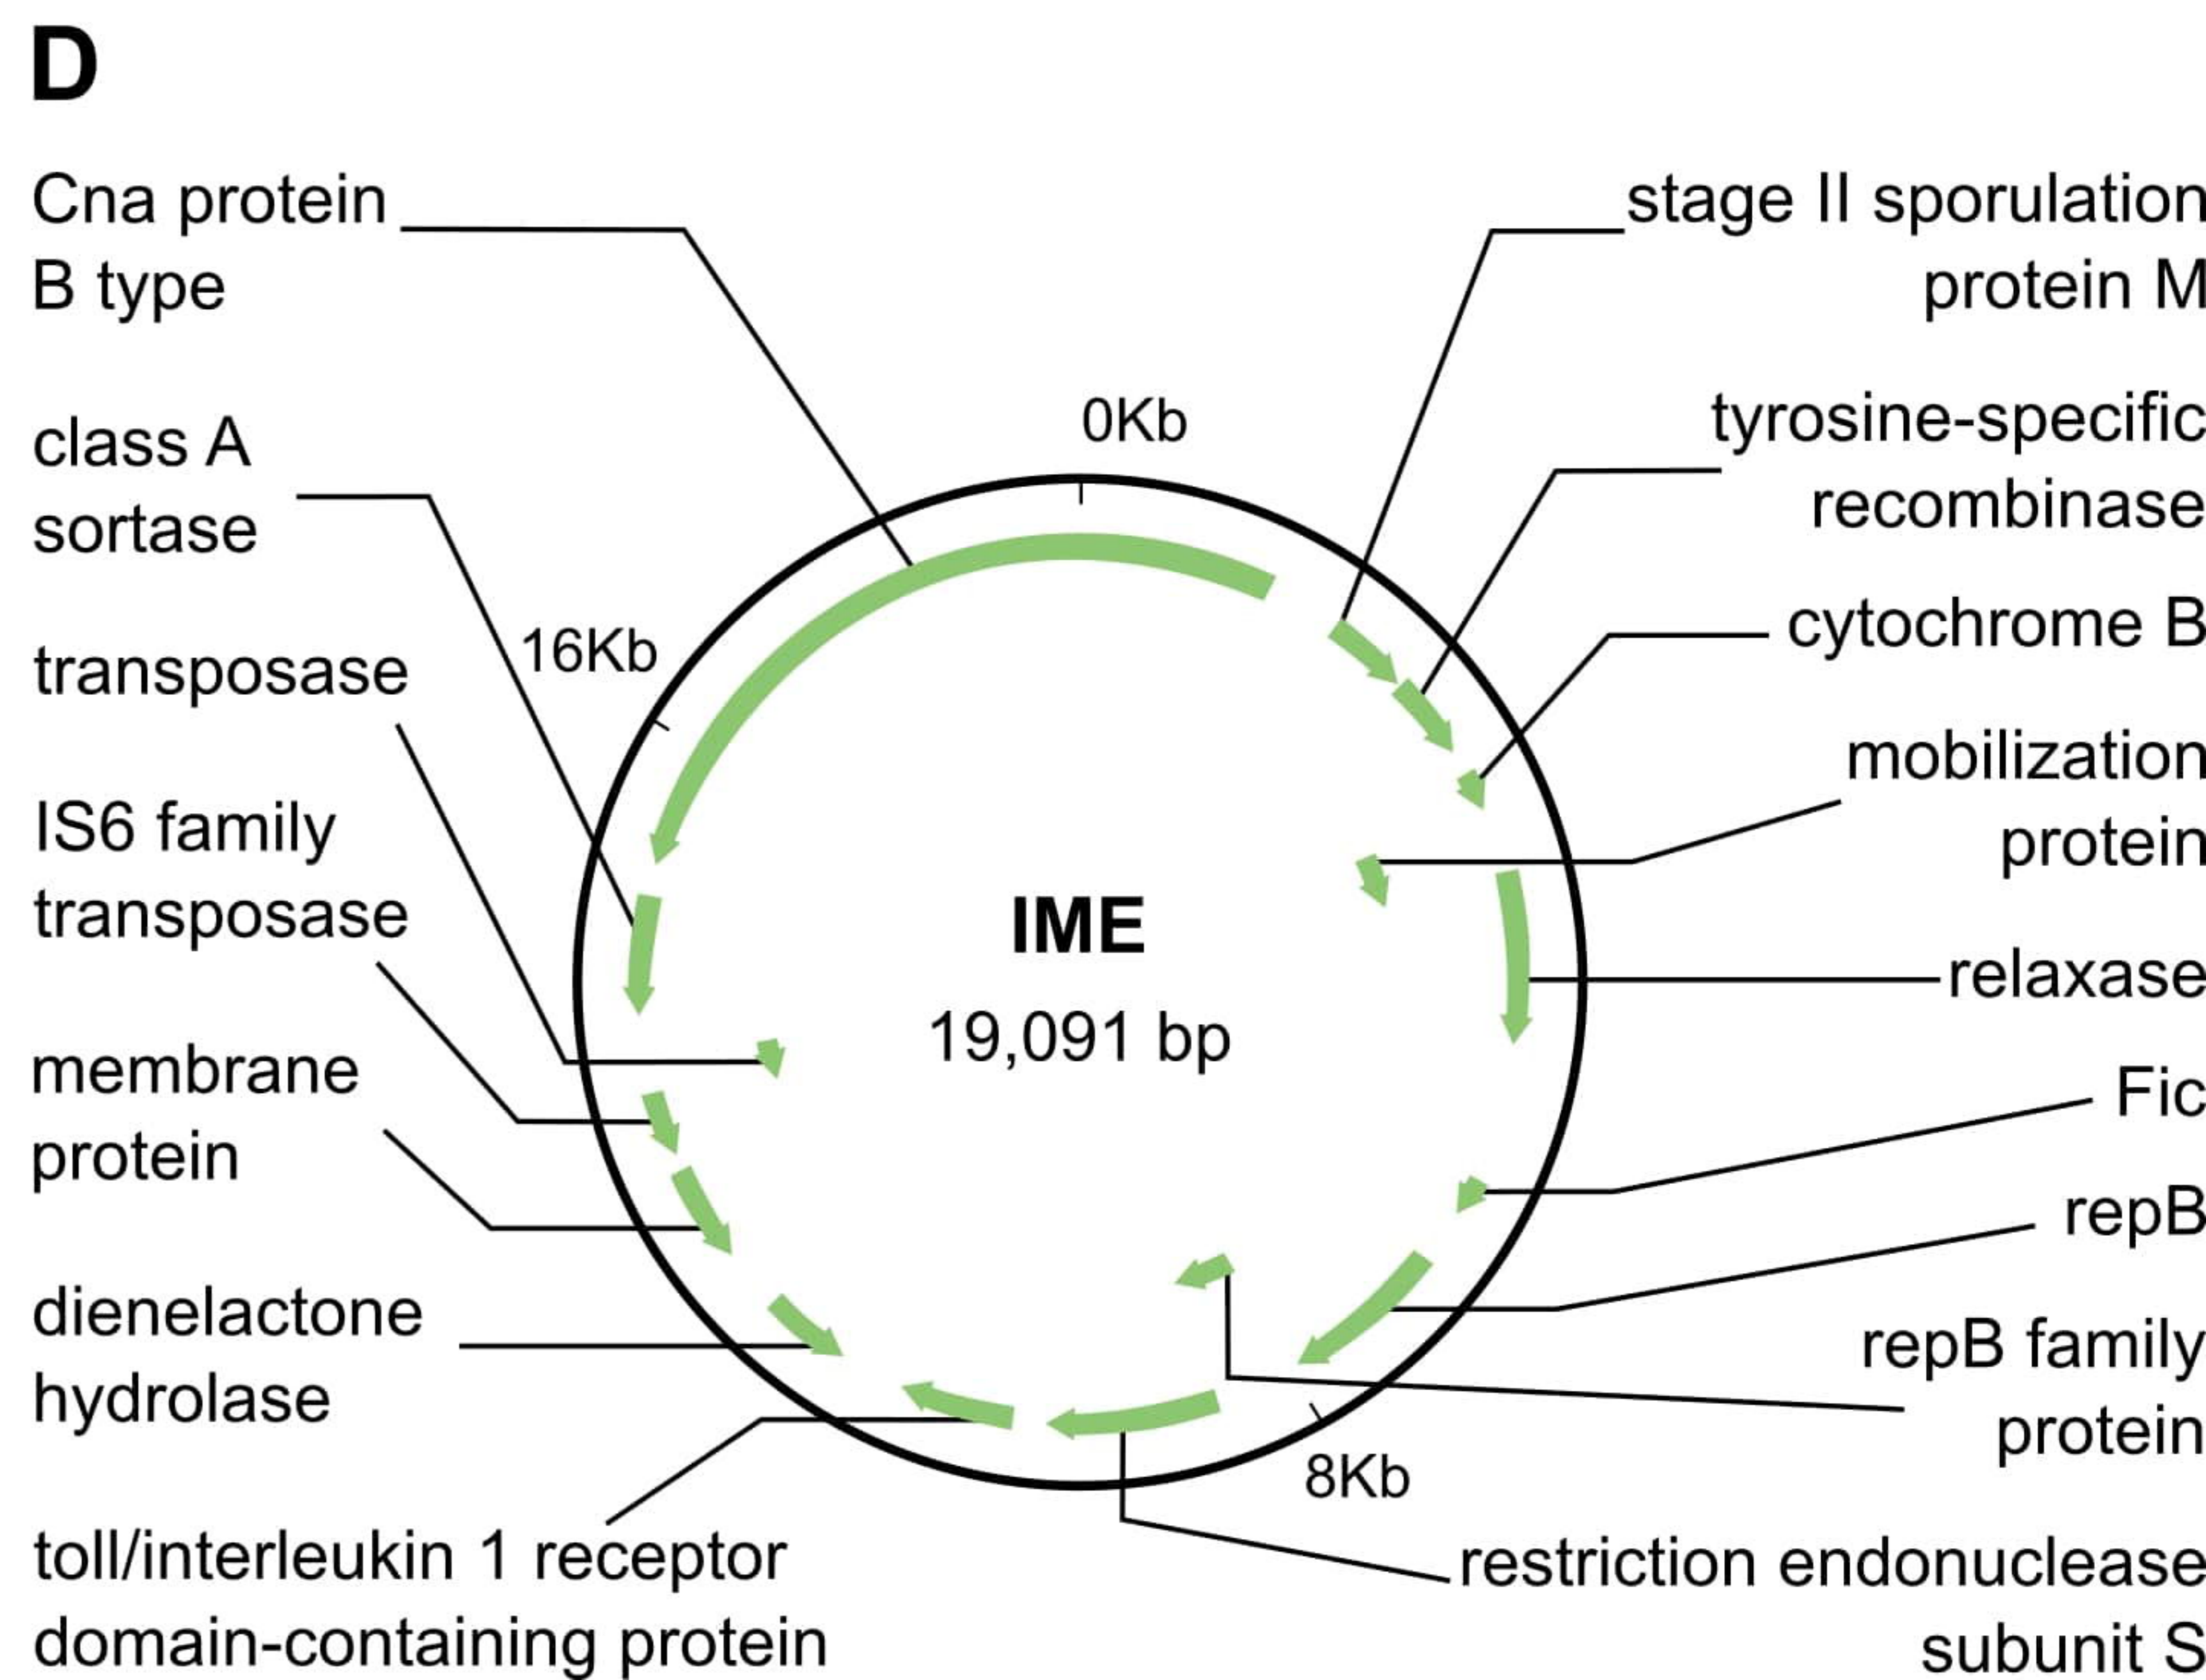



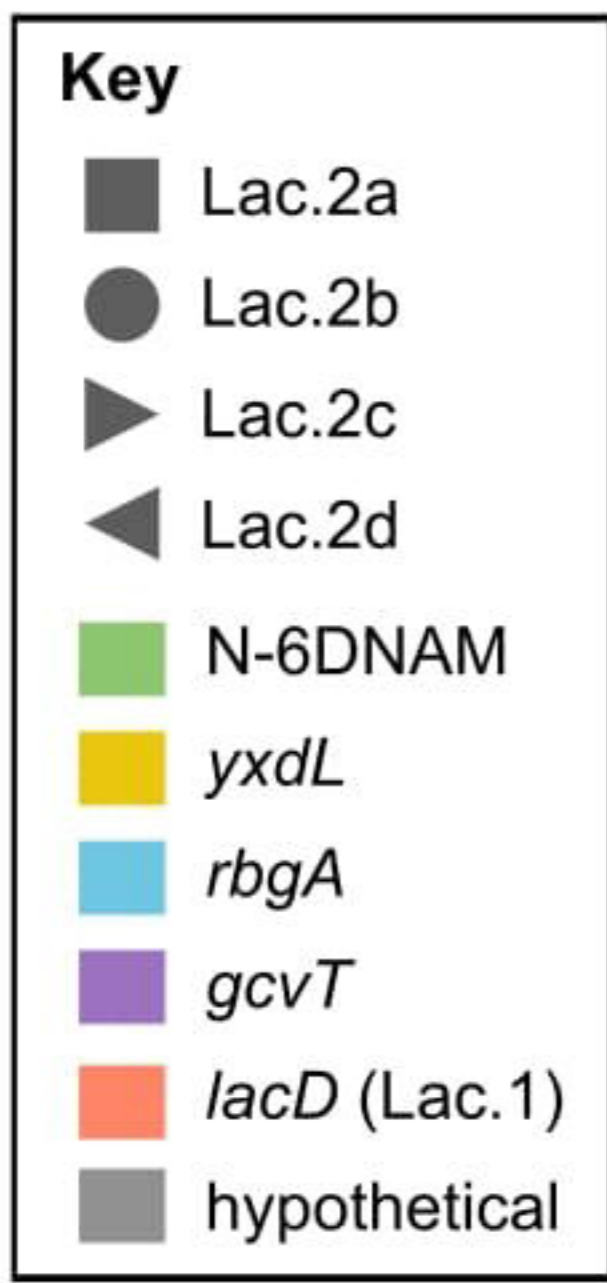

bioRxiv preprint doi: <https://doi.org/10.1101/2021.04.21.440740>; this version posted April 22, 2021. The copyright holder for this preprint (which was not certified by peer review) is the author/funder, who has granted bioRxiv a license to display the preprint in perpetuity. It is made available under aCC-BY-NC-ND 4.0 International license.

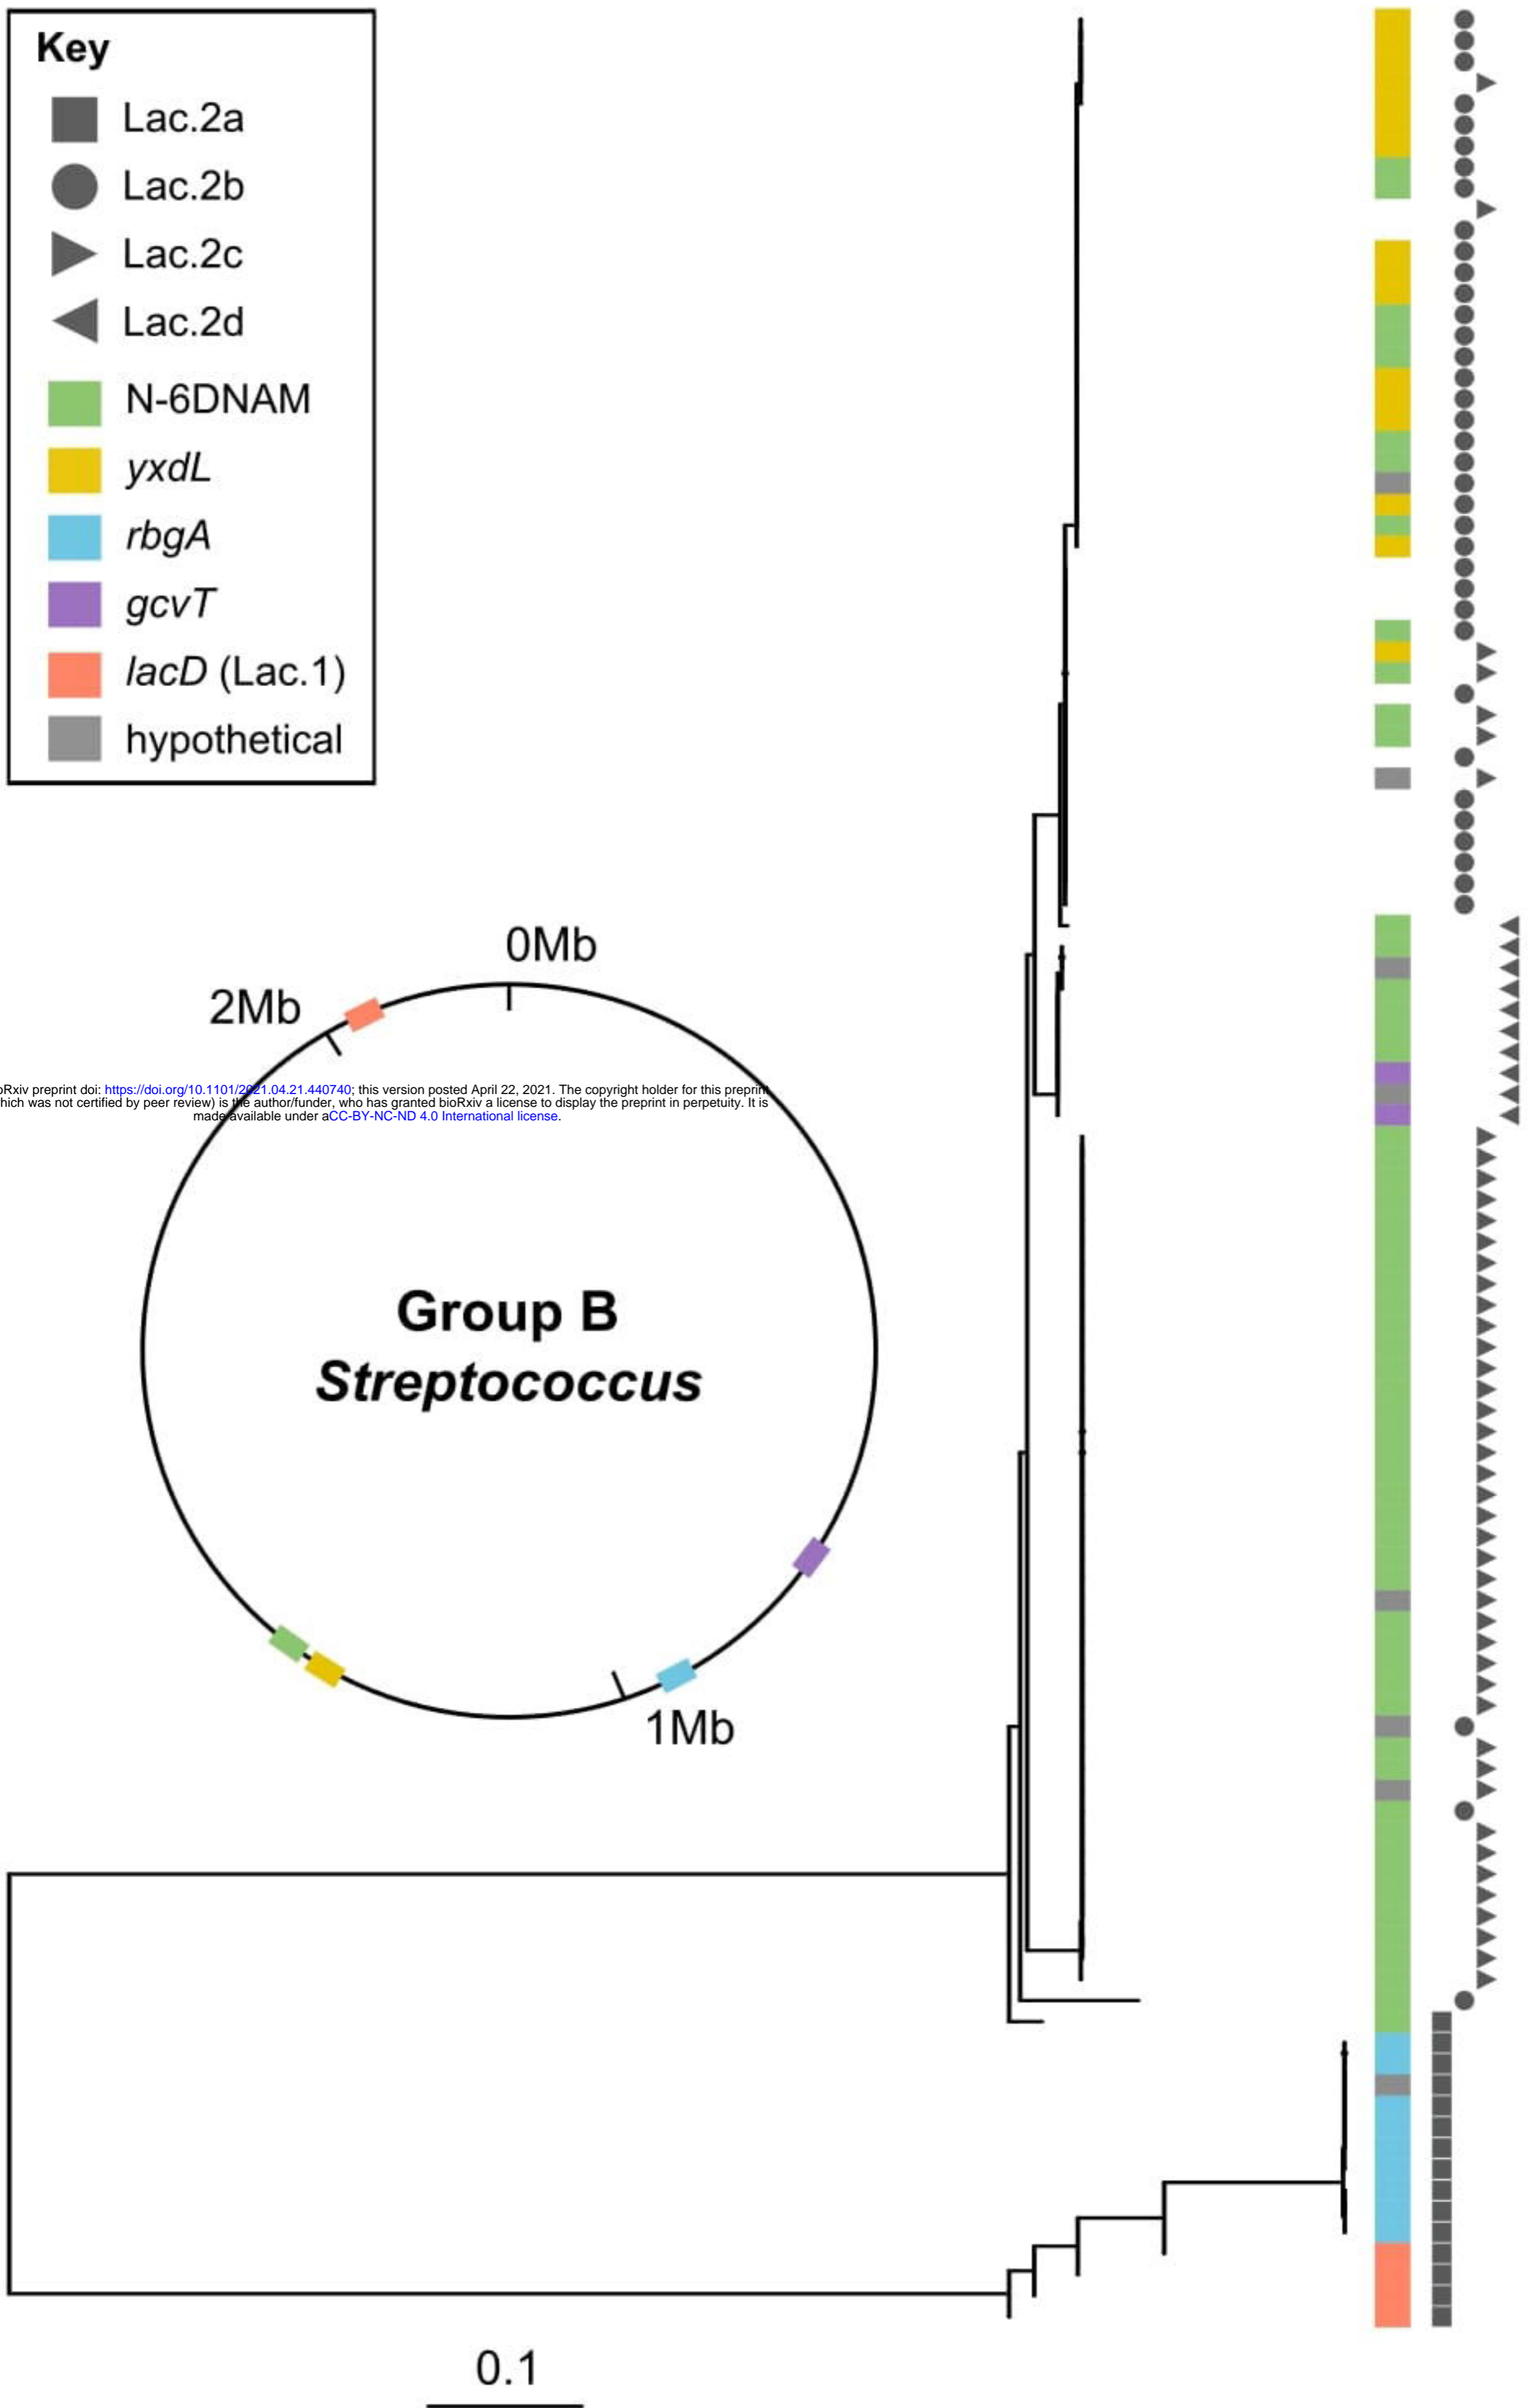

# Human

bioRxiv preprint doi: <https://doi.org/10.1101/2021.04.21.440740>; this version posted April 22, 2021. The copyright holder for this preprint (which was not certified by peer review) is the author/funder, who has granted bioRxiv a license to display the preprint in perpetuity. It is made available under aCC-BY-NC-ND 4.0 International license.

*S. dysgalactiae* subsp. *equisimilis*

*S. pyogenes*

**Group B Streptococcus (*S. agalactiae*)**

Plasmids  
Phages  
Transposons  
ABC transporters

Davies et al. (2005)

# Bovine

Lac.2  
Nisin operon

*S. uberis*

*S. dysgalactiae* subsp. *dysgalactiae*

Richards et al. (2011)
